# Supplementary material for: High-CO2 Levels Rather than Acidification Restrict Emiliania huxleyi Growth and Performance
Source: PubMed Central journal article supplement (PMC10293452; doi:10.1007/s00248-022-02035-3), 2022-05-27
Supplement: 248_2022_2035_MOESM1_ESM.pdf [file 248_2022_2035_MOESM1_ESM.pdf]

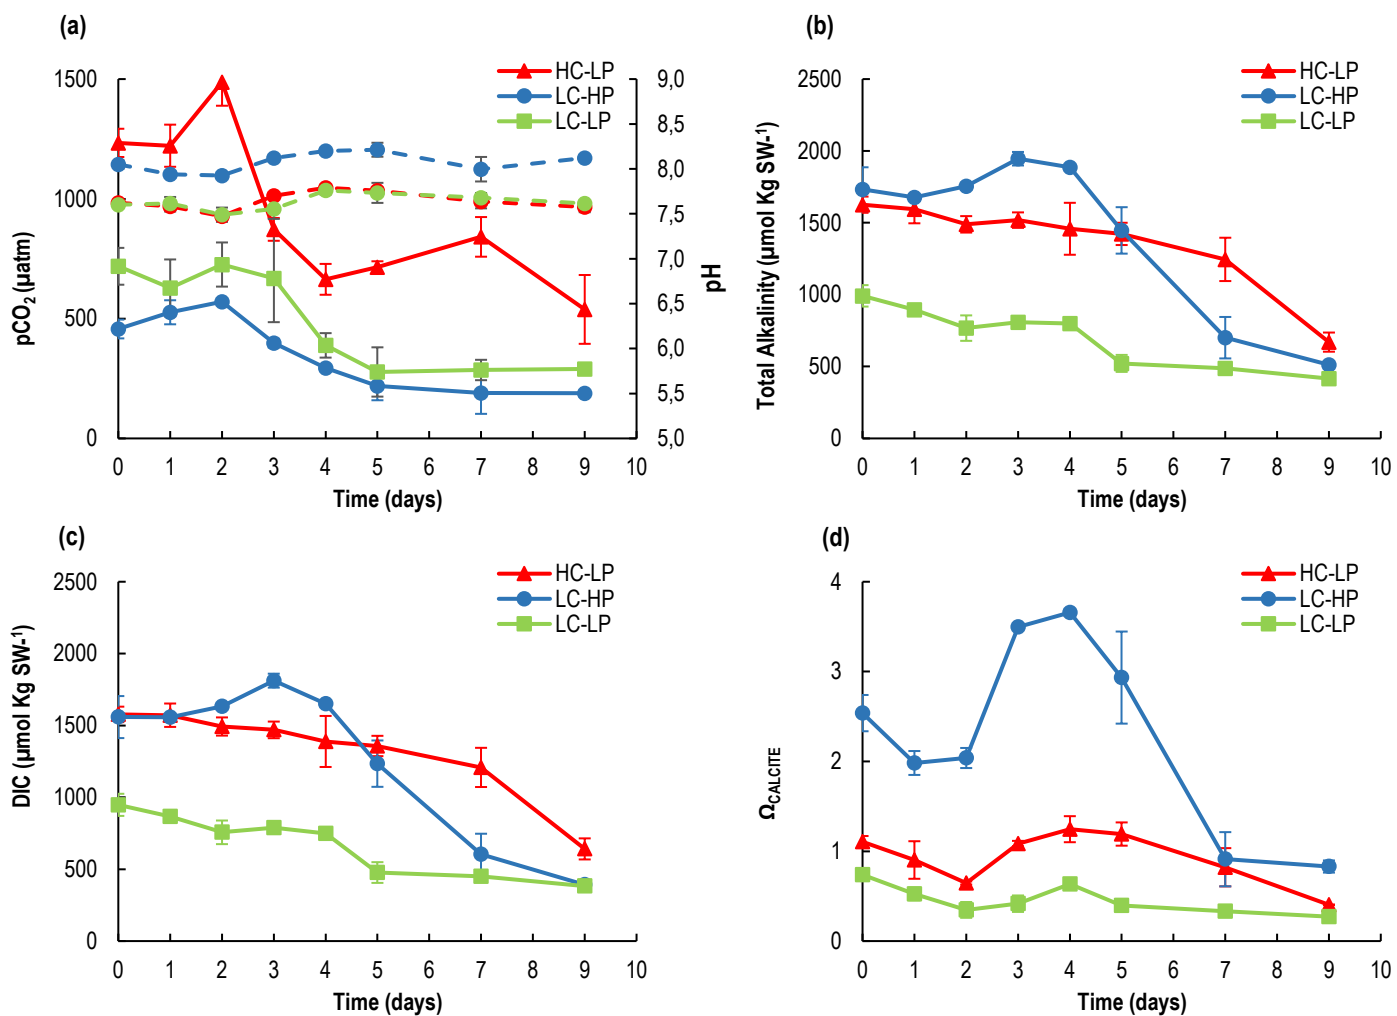

**Figure 1.** Measured pH (dotted line) (a) and total alkalinity (b), and calculated  $p\text{CO}_2$  (solid line) (a), dissolved inorganic carbon (DIC) (c), and calcite saturation estate ( $\Omega_{\text{calcite}}$ ) (d), in the different treatments: HC-LP ( $p\text{CO}_2$ : 1000-1200  $\mu\text{atm}$ ; pH: 7.6-7.8), LC-HP ( $p\text{CO}_2$ : 380-390  $\mu\text{atm}$ ; pH: 8.2) and LC-LP ( $p\text{CO}_2$ : 380-390  $\mu\text{atm}$ ; pH: 7.6-7.8). Values are mean  $\pm$  SD ( $n = 3$ ). Significant differences between treatments are indicated by different letters for any given time ( $p < 0.05$ ).

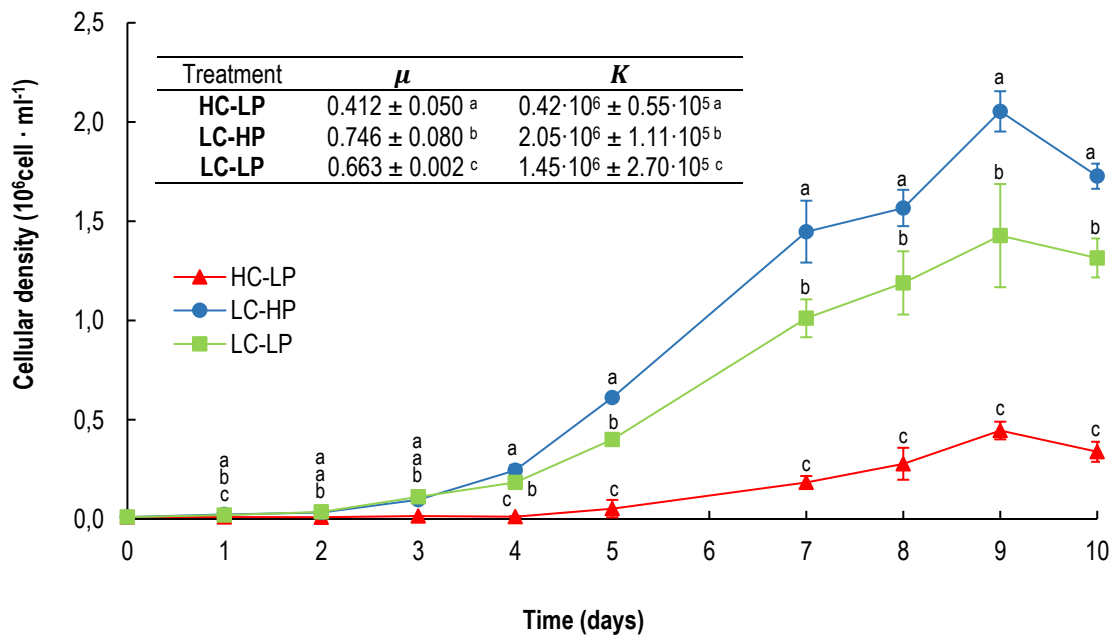

**Figure 2.** Cellular abundance ( $10^6 \text{ cell ml}^{-1}$ ), net growth rates ( $\mu$ ,  $\text{d}^{-1}$ ) and loading capacity ( $K$ ,  $10^6 \text{ cell ml}^{-1}$ ) of *E. huxleyi* cultures calculated with the logistic model of growth under HC-LP (1000-1200  $\mu\text{atm}$  and pH 7.6-7.8), LC-HP (380-390  $\mu\text{atm}$  and pH 8.1) and LC-LP (380-390  $\mu\text{atm}$  and pH 7.6-7.8). Values are mean  $\pm$  SD ( $n = 3$ ). Significant differences between treatments are indicated by different letters for any given time ( $p < 0.05$ ).

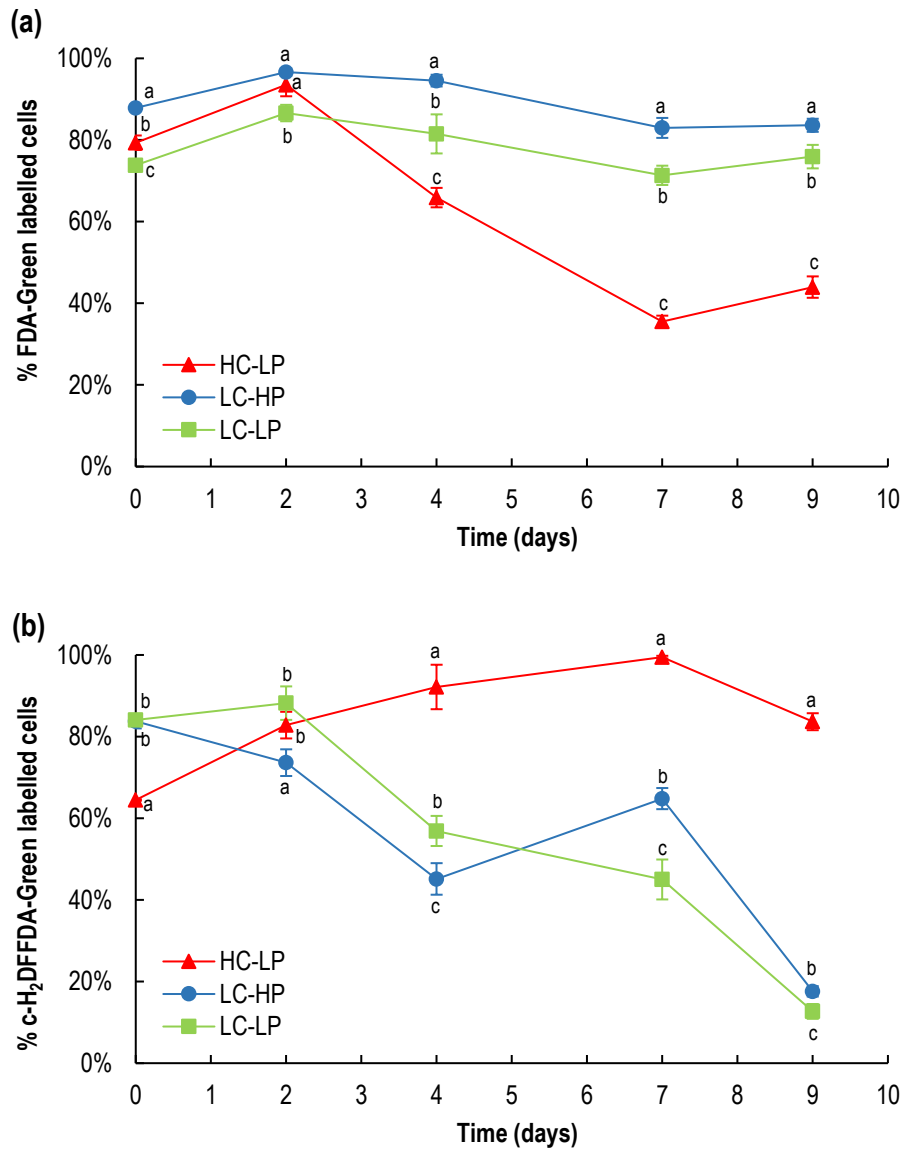

**Figure 3.** Variation of (a) cell viability measured as FDA-Green fluorescence labelled *E. huxleyi* cells and, (b) reactive oxygen species (ROS) measured as c-H<sub>2</sub>DFFDA-Green fluorescence labelled *E. huxleyi* cells in HC-LP (1000-1200  $\mu$ atm and pH 7.6-7.8), LC-HP (380-390  $\mu$ atm and pH 8.1) and LC-LP (380-390  $\mu$ atm and pH 7.6-7.8). Values are mean  $\pm$  SD ( $n = 3$ ). Significant differences between treatments are indicated by different letters for any given time ( $p < 0.05$ ).

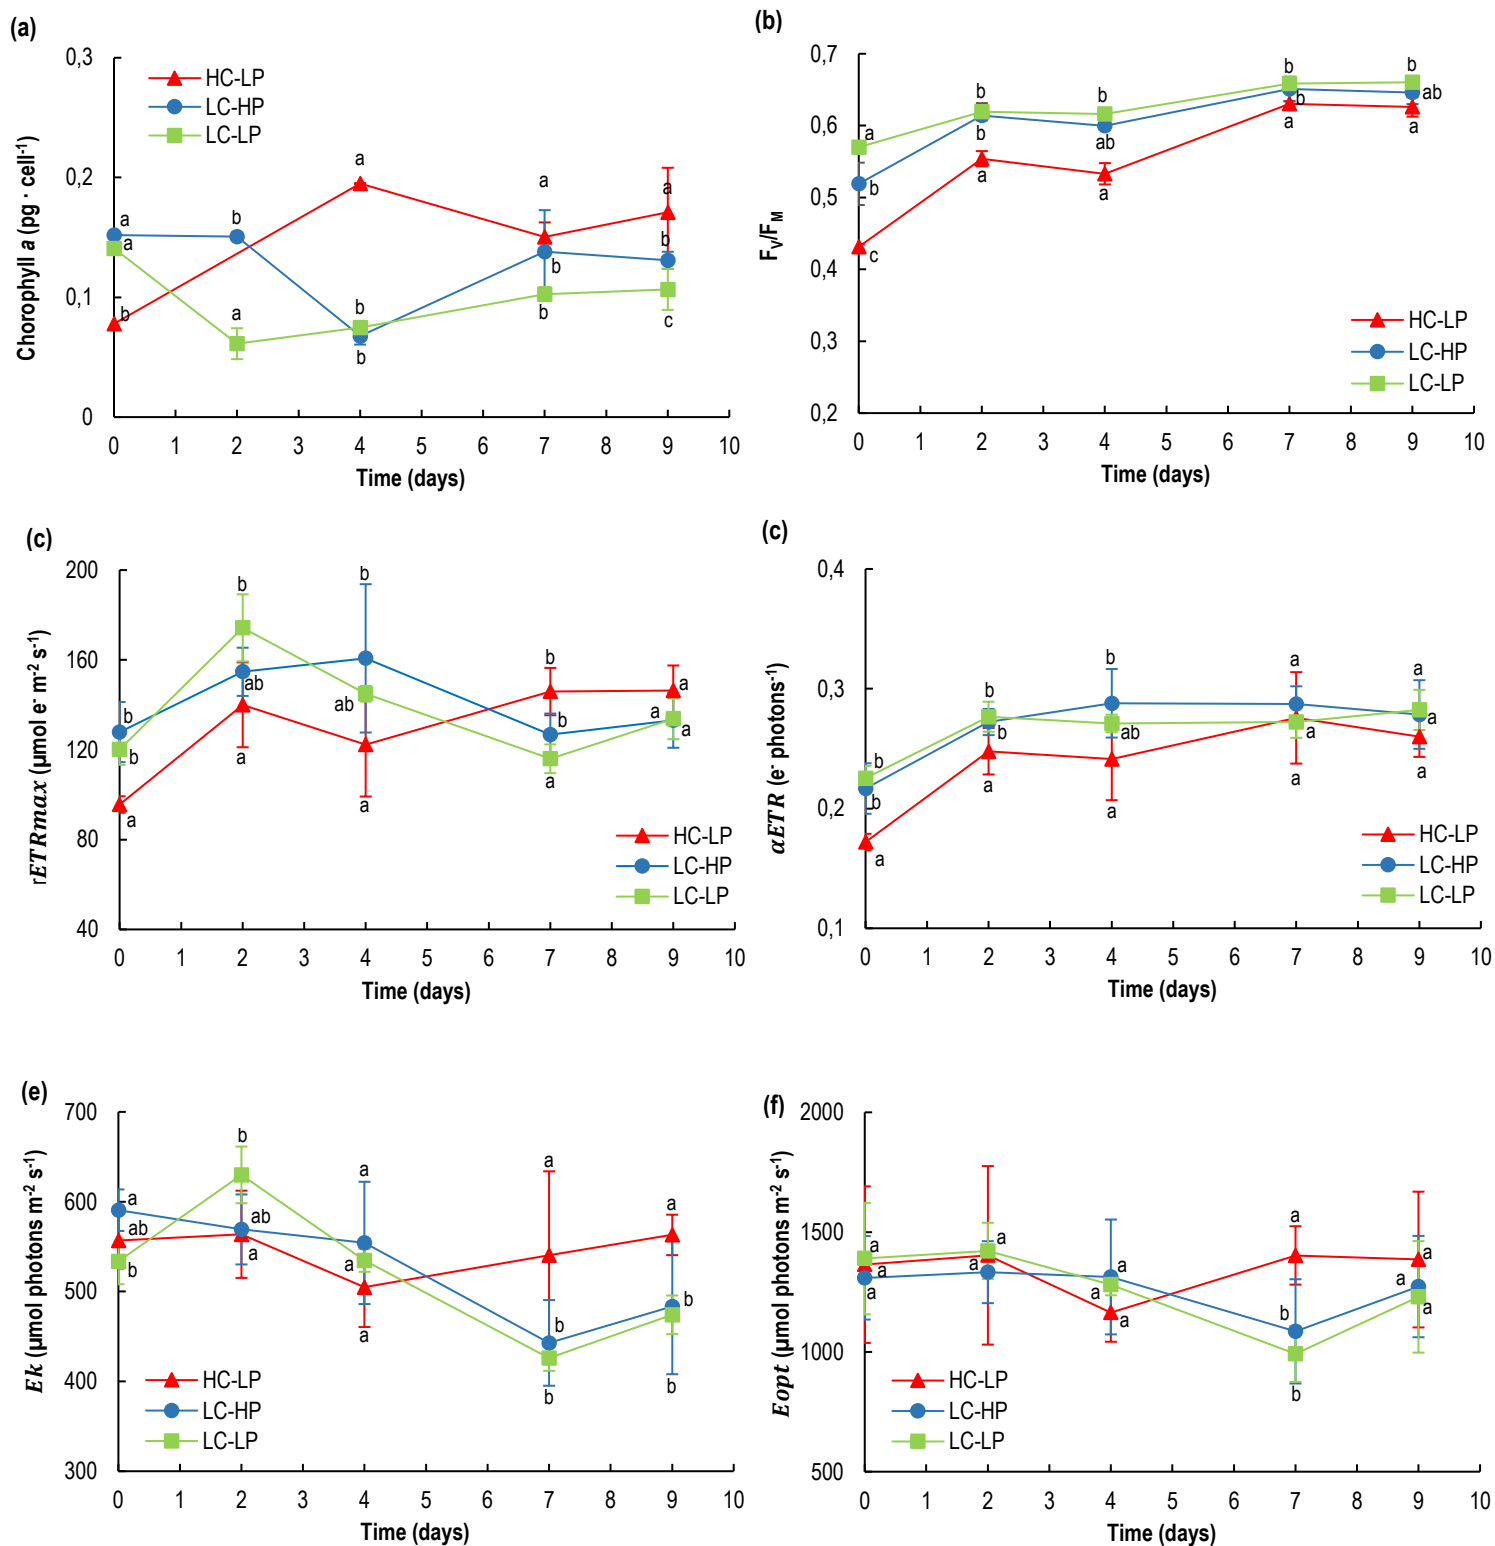

**Figure 4.** Photosynthetic parameters of rapid light curves in *E. huxleyi* cultures under conditions of HC-LP (1000-1200  $\mu\text{atm}$  and pH 7.6-7.8), LC-HP (380-390  $\mu\text{atm}$  and pH 8.2) and LC-LP (380-390  $\mu\text{atm}$  and pH 7.6-7.8). Chlorophyll *a* ( $\text{pg cell}^{-1}$ ) (a), optimal quantum yield of Chl *a* associated to photosystem II ( $F_v/F_M$ ) (b), relative maximum ETR ( $r\text{ETR}_{\text{max}}$ ) (c), photosynthetic efficiency ( $\alpha_{\text{ETR}}$ ) (d), saturation irradiance ( $E_k$ ) (e), and the highest irradiance just before photoinhibition occurs ( $E_{\text{opt}}$ ) (f). Values are mean  $\pm$  SD ( $n = 3$ ). Significant differences between treatments are indicated by different letters for any given time ( $p < 0.05$ ).

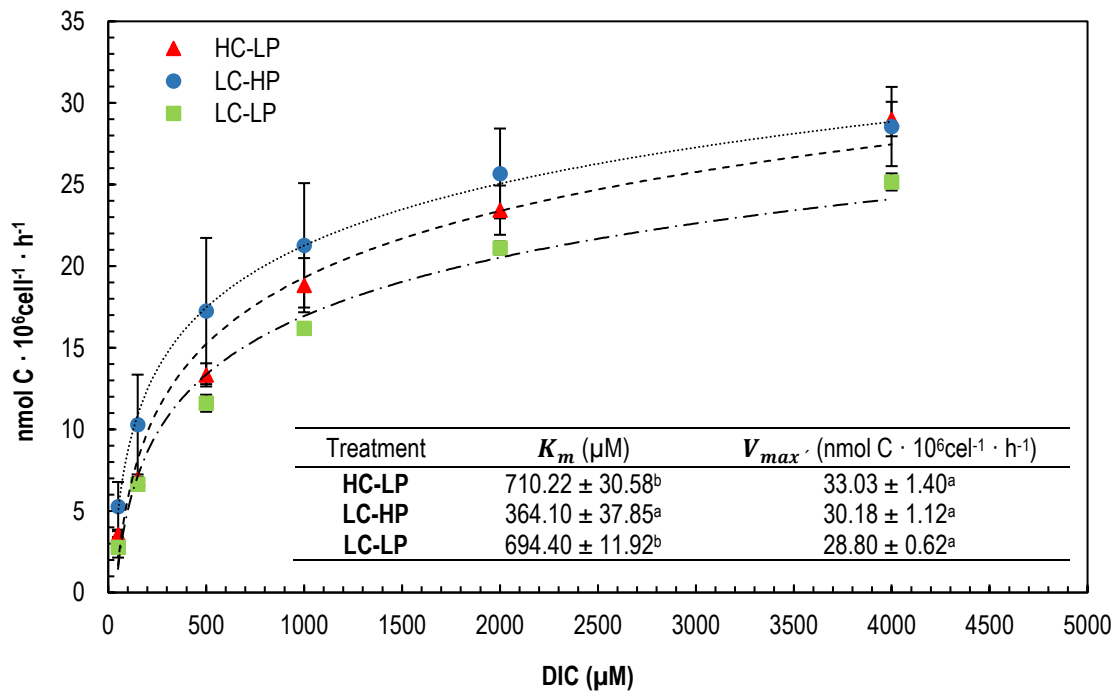

**Figure 5.** Carbon fixation rate showing  $K_m$  ( $\mu\text{M}$ ) and  $V_{max}$  ( $\text{nmol C} \cdot 10^6 \text{cel}^{-1} \cdot \text{h}^{-1}$ ) for *E. huxleyi* in  $d_4$  under HC-LP (1000-1200  $\mu\text{atm}$  and pH 7.6-7.8), LC-HP (380-390  $\mu\text{atm}$  and pH 8.1) and LC-LP (380-390  $\mu\text{atm}$  and pH 7.6-7.8) treatments. DIC concentrations in the assay medium were 50, 150, 500, 1000, 2000, 4000  $\mu\text{M}$ . The kinetic parameters were calculated by fitting to Michaelis-Menten kinetics. Values are mean  $\pm$  SD ( $n = 3$ ). Significant differences between treatments are indicated by different letters ( $p < 0.05$ ).

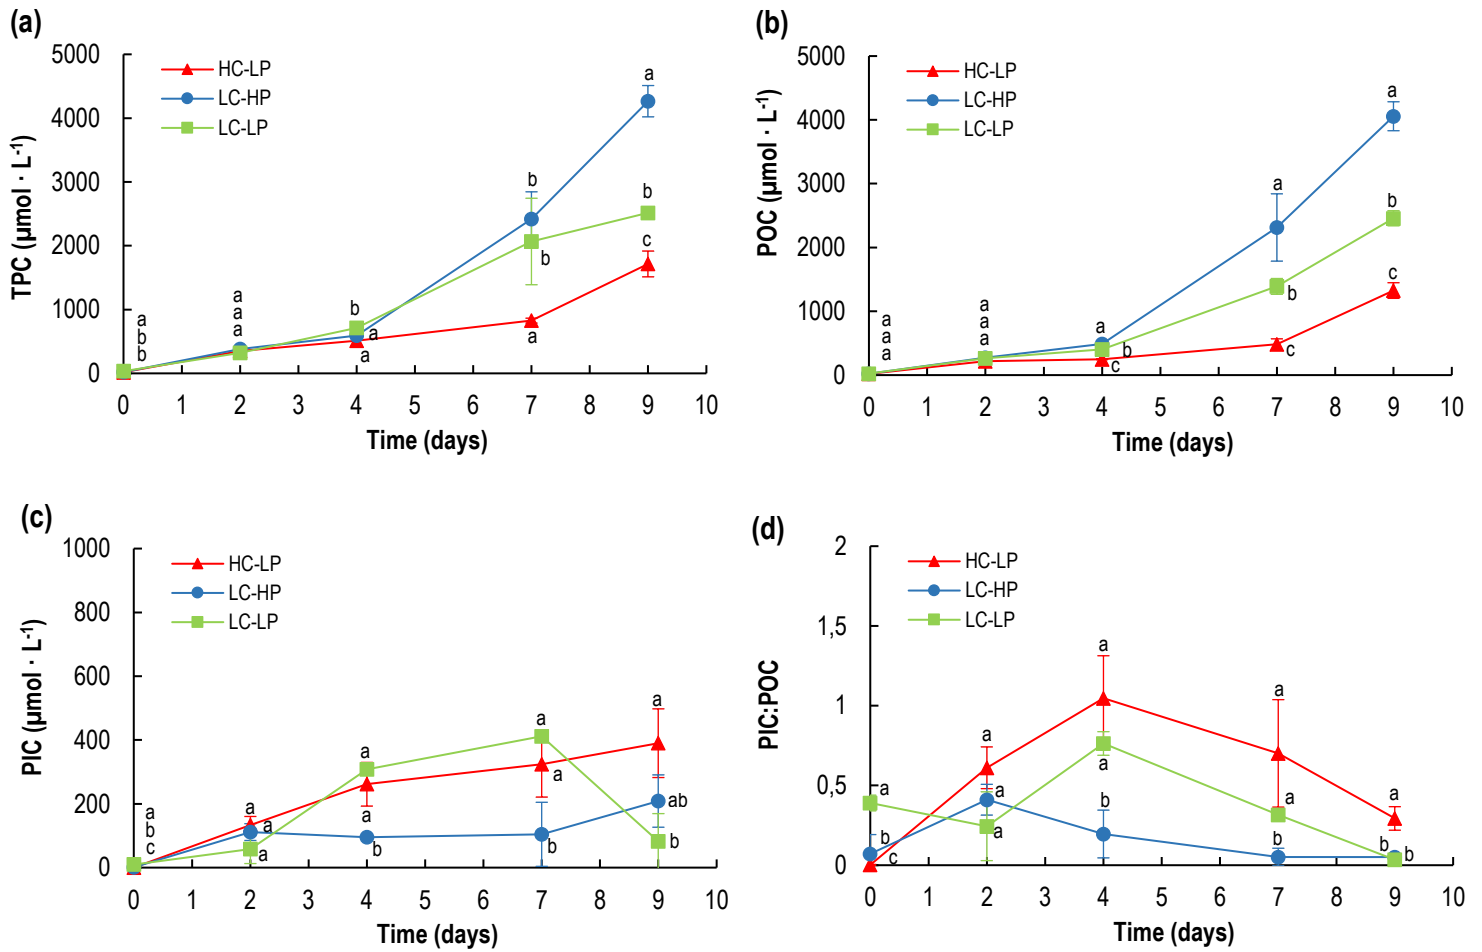

**Figure 6.** Temporal development of total particulate carbon, TPC (a), particulate organic carbon, POC (b) and particulate inorganic carbon, PIC (c) concentrations ( $\mu\text{mol L}^{-1}$ ) and molar inorganic C (PIC): organic C ratio (POC) (d) in *E. huxleyi* cultures under HC-LP (1000-1200  $\mu\text{atm}$  and pH 7.6-7.8), LC-HP (380-390  $\mu\text{atm}$  and pH 8.2) and LC-LP (380-390  $\mu\text{atm}$  and pH 7.6-7.8). Values are mean  $\pm$  SD ( $n = 3$ ). Significant differences between treatments are indicated by different letters for any given time ( $p < 0.05$ ).

(a) LC-HP

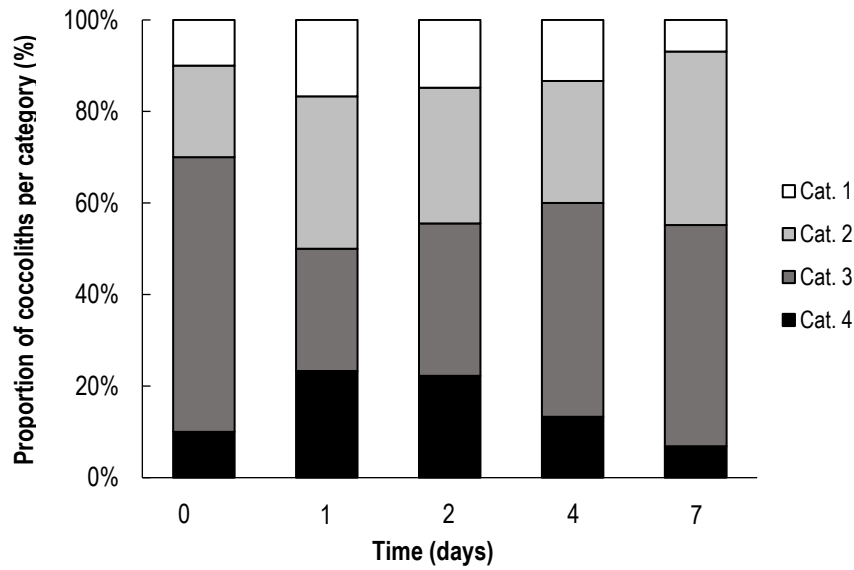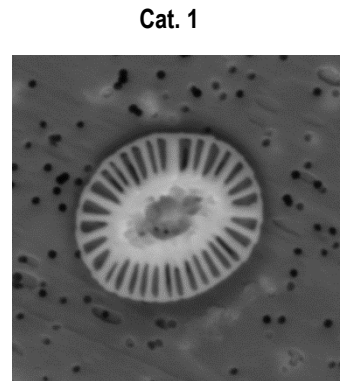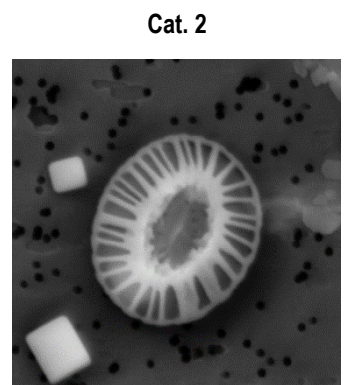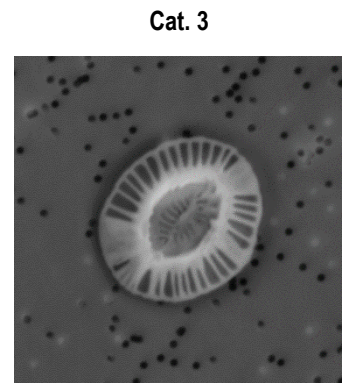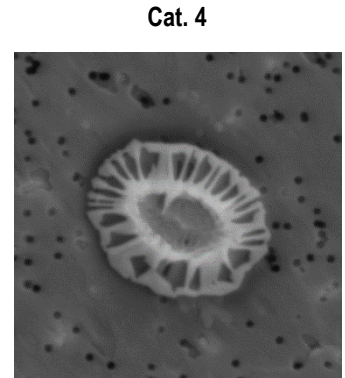

(b) HC-LP

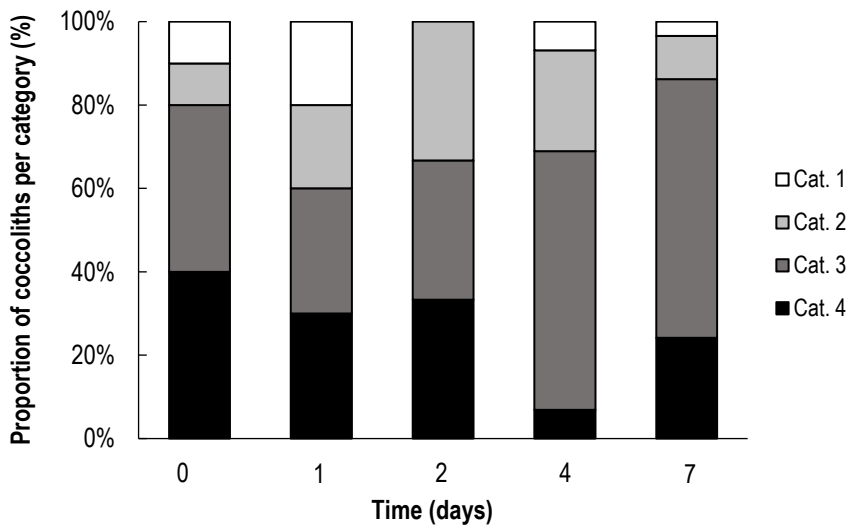

(c) LC-LP

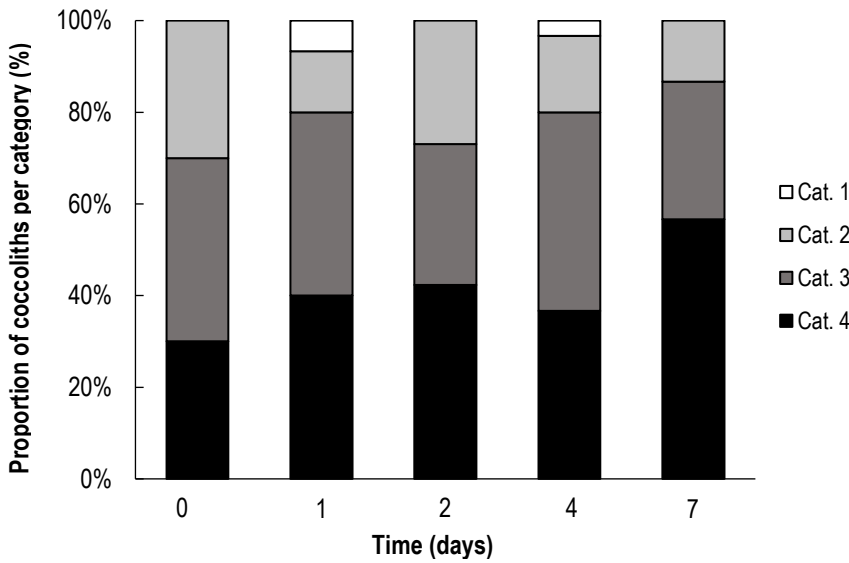

**Figure 7.** Percentage of *E. huxleyi* coccoliths per category. We assigned cat. 1 to normal intact coccoliths, and cat. 4 to fragmented coccoliths in all different treatments; LC-HP (380-390  $\mu\text{atm}$  and pH 8.2) (a), HC-LP(1000-1200  $\mu\text{atm}$  and pH 7.6-7.8) (b) and LC-LP 380-390  $\mu\text{atm}$  and pH 7.6-7.8).



(a) LC-HP

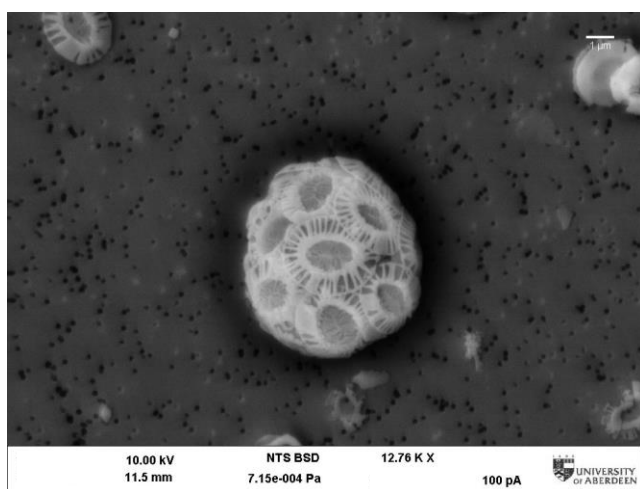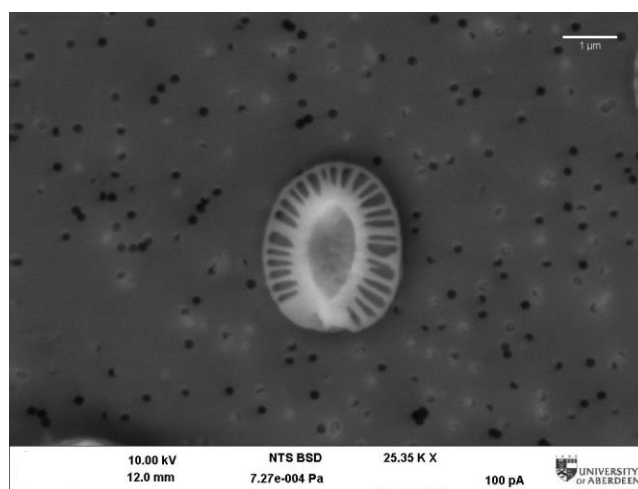

(b) HC-LP

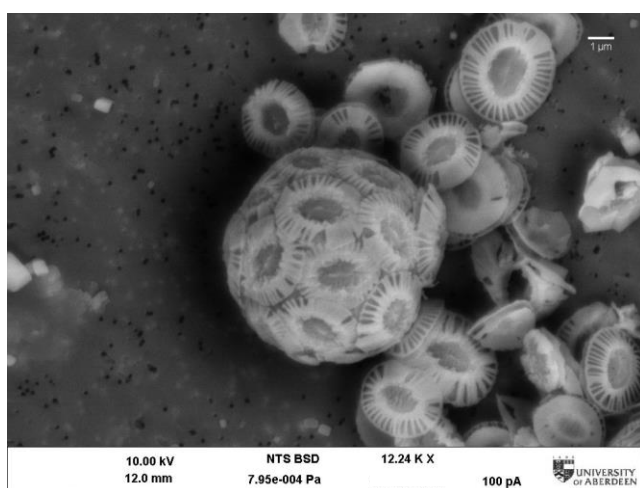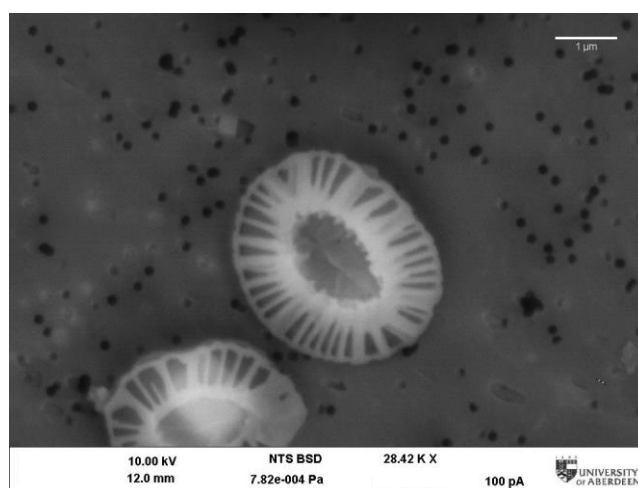

(c) LC-LP

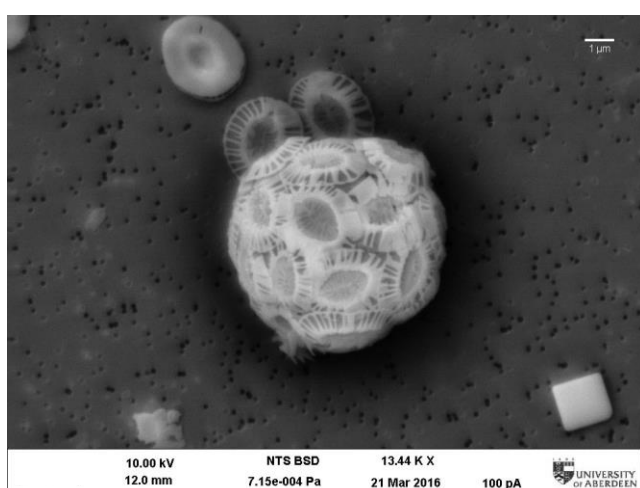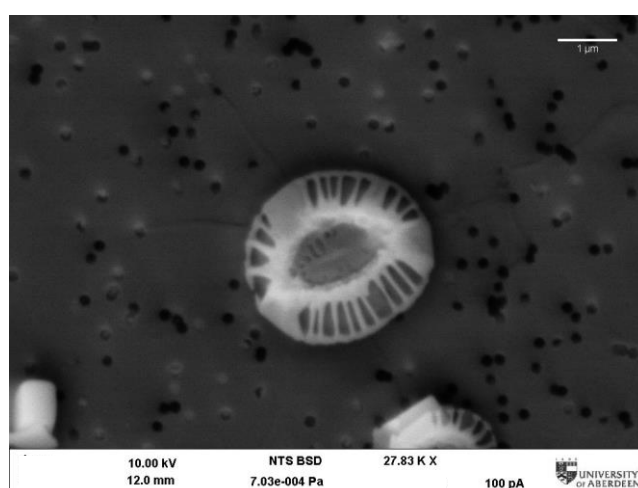

**Figure S1.** Representative scanning electron microscopy (SEM) images of *E. huxleyi* cells grown under different concentrations of CO<sub>2</sub> and pH values on d<sub>4</sub>. (a) 380-390 µatm and pH 8.2; (b) 1000-1200 µatm and pH 7.6-7.8 and (c) 380-390 µatm and pH 7.6-7.8. The scale bars are in µm. The images were selected from a large dataset of SEM micrographs to show the general pattern in calcification of coccospheres and coccoliths.

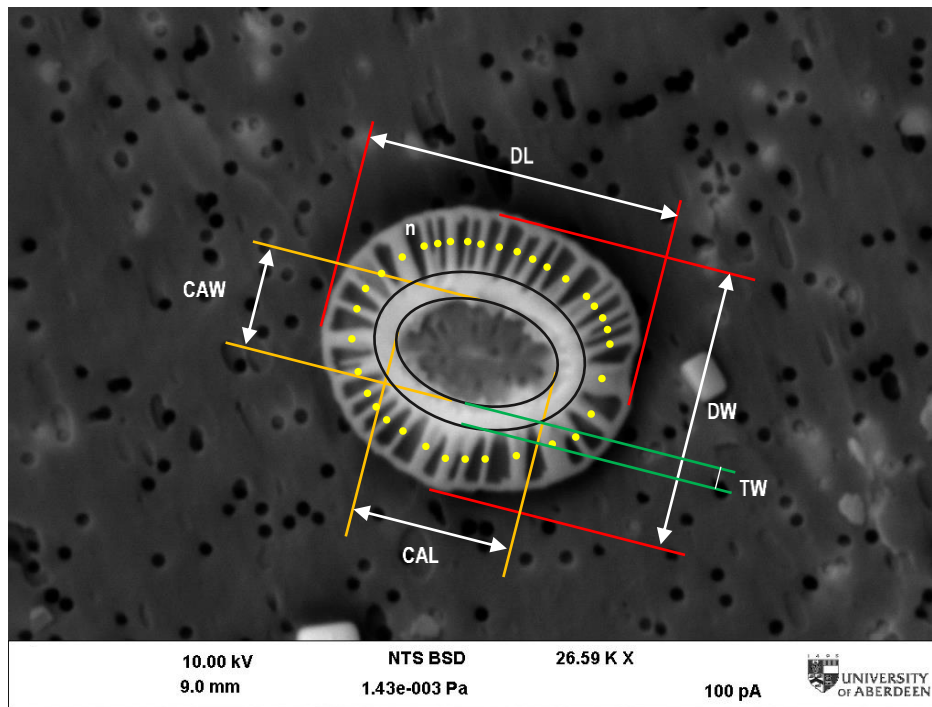

**Figure S2.** Morphometric parameters of coccoliths of *E. huxleyi* measured in distal view scanning electron micrographs (SEM). DL, Length of the distal shield; DW, width of the distal shield; CAL, length of the central area; CAW, width of the central area; n, number of segments; TW, tube width.

| Treatment    | $\delta^{13}\text{C}_{\text{microalgae}}$ (‰) | pH compensation point      |
|--------------|-----------------------------------------------|----------------------------|
| <b>HC-LP</b> | $-28.37 \pm 1.10^{\text{a}}$                  | $8.02 \pm 0.03^{\text{a}}$ |
| <b>LC-HP</b> | $-16.07 \pm 0.27^{\text{b}}$                  | $9.70 \pm 0.07^{\text{b}}$ |
| <b>LC-LP</b> | $-18.17 \pm 1.15^{\text{b}}$                  | $9.17 \pm 0.03^{\text{c}}$ |

**Table 1.** Corrected  $\delta^{13}\text{C}$  isotopic discrimination ( $\delta^{13}\text{C}_{\text{microalga}}$ ) and pH compensation point for *E. huxleyi* under the different experimental conditions on day 9; HC-LP ( $p\text{CO}_2$ : 1000-1200  $\mu\text{atm}$ ; pH: 7.6-7.8), LC-HP ( $p\text{CO}_2$ : 380-390  $\mu\text{atm}$ ; pH: 8.2) and LC-LP ( $p\text{CO}_2$ : 380-390  $\mu\text{atm}$ ; pH: 7.6-7.8). Values are mean  $\pm$  SD. Significant differences between treatments are indicated by different letters ( $p < 0.05$ ).

| Day | POC (pg cell <sup>-1</sup> ) |                           |                            | PIC (pg cell <sup>-1</sup> ) |                           |                           |
|-----|------------------------------|---------------------------|----------------------------|------------------------------|---------------------------|---------------------------|
|     | HC-LP                        | LC-HP                     | LC-LP                      | HC-LP                        | LC-HP                     | LC-LP                     |
| 0   | 23.61 ± 2.83 <sup>a</sup>    | 25.82 ± 9.40 <sup>a</sup> | 29.40 ± 0.91 <sup>a</sup>  | 0.12 ± 0.00 <sup>a</sup>     | 3.62 ± 0.00 <sup>b</sup>  | 11.47 ± 1.60 <sup>c</sup> |
| 2   | 285.87 ± 23.91 <sup>a</sup>  | 97.76 ± 0.48 <sup>b</sup> | 81.31 ± 11.42 <sup>b</sup> | 174.17 ± 35.93 <sup>a</sup>  | 40.16 ± 9.47 <sup>b</sup> | 27.31 ± 9.75 <sup>b</sup> |
| 4   | 241.51 ± 7.28 <sup>a</sup>   | 23.83 ± 0.23 <sup>b</sup> | 26.45 ± 1.93 <sup>b</sup>  | 253.24 ± 66.24 <sup>a</sup>  | 4.66 ± 0.29 <sup>b</sup>  | 20.09 ± 0.70 <sup>b</sup> |
| 7   | 31.36 ± 5.53 <sup>a</sup>    | 19.18 ± 4.37 <sup>b</sup> | 16.50 ± 1.47 <sup>b</sup>  | 21.06 ± 6.68 <sup>a</sup>    | 0.86 ± 0.83 <sup>b</sup>  | 4.89 ± 0.00 <sup>b</sup>  |
| 9   | 35.68 ± 3.30 <sup>a</sup>    | 23.70 ± 1.32 <sup>b</sup> | 20.65 ± 1.00 <sup>b</sup>  | 10.50 ± 2.90 <sup>a</sup>    | 1.49 ± 0.004 <sup>b</sup> | 0.69 ± 0.73 <sup>b</sup>  |

**Table 2.** Particulate organic (POC) and inorganic (PIC) carbon cell quotas for *E. huxleyi* (pg cell<sup>-1</sup>) in HC-LP (1000-1200 μatm and pH 7.6-7.8), LC-HP (380-390 μatm and pH 8.1) and LC-LP (380-390 μatm and pH 7.6-7.8). Values are mean ± SD (n = 3). Significant differences between treatments are indicated by different letters for any given time (p < 0.05).

| Day | pCO <sub>2</sub> (µatm)      |                             |                              | pH (NBS Scale)           |                          |                          | Ω <sub>CALCITE</sub>      |                          |                          | TA (µmol kg SW <sup>-1</sup> ) |                               |                             |
|-----|------------------------------|-----------------------------|------------------------------|--------------------------|--------------------------|--------------------------|---------------------------|--------------------------|--------------------------|--------------------------------|-------------------------------|-----------------------------|
|     | HC-LP                        | LC-HP                       | LC-LP                        | HC-LP                    | LC-HP                    | LC-LP                    | HC-LP                     | LC-HP                    | LC-LP                    | HC-LP                          | LC-HP                         | LC-LP                       |
| 0   | 1233.65 ± 59.00 <sup>a</sup> | 456.75 ± 39.20 <sup>b</sup> | 718.48 ± 76.87 <sup>c</sup>  | 7.62 ± 0.03 <sup>b</sup> | 8.05 ± 0.05 <sup>a</sup> | 7.60 ± 0.01 <sup>b</sup> | 1.11 ± 0.06 <sup>a</sup>  | 2.54 ± 0.20 <sup>b</sup> | 0.74 ± 0.03 <sup>c</sup> | 1626.02 ± 56.33 <sup>b</sup>   | 1733.33 ± 153.12 <sup>b</sup> | 991.87 ± 74.51 <sup>a</sup> |
| 1   | 1221.82 ± 87.90 <sup>a</sup> | 526.51 ± 50.20 <sup>b</sup> | 628.26 ± 118.82 <sup>b</sup> | 7.58 ± 0.06 <sup>b</sup> | 7.94 ± 0.04 <sup>a</sup> | 7.62 ± 0.07 <sup>b</sup> | 0.90 ± 0.21 <sup>b</sup>  | 1.98 ± 0.13 <sup>a</sup> | 0.52 ± 0.07 <sup>b</sup> | 1593.50 ± 96.87 <sup>b</sup>   | 1678.05 ± 4.88 <sup>b</sup>   | 895.93 ± 22.00 <sup>a</sup> |
| 2   | 1487.34 ± 98.65 <sup>a</sup> | 570.54 ± 13.30 <sup>b</sup> | 725.88 ± 92.14 <sup>b</sup>  | 7.47 ± 0.02 <sup>b</sup> | 7.93 ± 0.02 <sup>a</sup> | 7.49 ± 0.08 <sup>b</sup> | 0.65 ± 0.02 <sup>a</sup>  | 2.04 ± 0.11 <sup>b</sup> | 0.35 ± 0.09 <sup>c</sup> | 1489.43 ± 57.17 <sup>a</sup>   | 1754.47 ± 25.03 <sup>b</sup>  | 767.48 ± 88.52 <sup>c</sup> |
| 3   | 872.53 ± 47.54 <sup>a</sup>  | 397.60 ± 18.62 <sup>b</sup> | 668.34 ± 183.07 <sup>b</sup> | 7.70 ± 0.01 <sup>b</sup> | 8.12 ± 0.01 <sup>a</sup> | 7.55 ± 0.11 <sup>b</sup> | 1.09 ± 0.03 <sup>a</sup>  | 3.50 ± 0.03 <sup>b</sup> | 0.42 ± 0.09 <sup>c</sup> | 1518.70 ± 53.73 <sup>a</sup>   | 2026.02 ± 45.06 <sup>b</sup>  | 808.13 ± 22.53 <sup>c</sup> |
| 4   | 664.06 ± 64.41 <sup>a</sup>  | 294.14 ± 10.15 <sup>b</sup> | 388.36 ± 51.10 <sup>b</sup>  | 7.79 ± 0.01 <sup>b</sup> | 8.20 ± 0.01 <sup>a</sup> | 7.76 ± 0.05 <sup>b</sup> | 1.25 ± 0.14 <sup>a</sup>  | 3.66 ± 0.04 <sup>b</sup> | 0.63 ± 0.05 <sup>c</sup> | 1458.54 ± 180.69 <sup>a</sup>  | 1886.18 ± 14.90 <sup>b</sup>  | 800.00 ± 12.91 <sup>c</sup> |
| 5   | 715.11 ± 24.33 <sup>a</sup>  | 218.60 ± 59.28 <sup>b</sup> | 277.37 ± 102.92 <sup>b</sup> | 7.76 ± 0.01 <sup>b</sup> | 8.21 ± 0.08 <sup>a</sup> | 7.73 ± 0.11 <sup>b</sup> | 1.19 ± 0.13 <sup>b</sup>  | 2.93 ± 0.51 <sup>a</sup> | 0.40 ± 0.05 <sup>b</sup> | 1422.76 ± 77.49 <sup>b</sup>   | 1447.15 ± 161.59 <sup>a</sup> | 521.95 ± 59.14 <sup>b</sup> |
| 7   | 841.27 ± 82.73 <sup>a</sup>  | 189.50 ± 86.96 <sup>b</sup> | 285.59 ± 42.56 <sup>b</sup>  | 7.64 ± 0.08 <sup>b</sup> | 8.00 ± 0.14 <sup>a</sup> | 7.68 ± 0.05 <sup>b</sup> | 0.82 ± 0.21 <sup>ab</sup> | 0.91 ± 0.30 <sup>a</sup> | 0.33 ± 0.03 <sup>b</sup> | 1245.53 ± 150.69 <sup>a</sup>  | 700.81 ± 144.24 <sup>b</sup>  | 487.80 ± 12.91 <sup>b</sup> |
| 9   | 538.48 ± 143.68 <sup>a</sup> | 188.75 ± 0.74 <sup>b</sup>  | 290.04 ± 3.71 <sup>b</sup>   | 7.58 ± 0.06 <sup>b</sup> | 8.12 ± 0.01 <sup>a</sup> | 7.62 ± 0.01 <sup>b</sup> | 0.40 ± 0.004 <sup>a</sup> | 0.83 ± 0.07 <sup>b</sup> | 0.27 ± 0.01 <sup>c</sup> | 669.92 ± 66.59 <sup>a</sup>    | 512.20 ± 27.16 <sup>b</sup>   | 416.26 ± 10.15 <sup>b</sup> |

| Day | DIC (µmol kg SW <sup>-1</sup> ) |                               |                             | CO <sub>3</sub> <sup>2-</sup> (µmol kg SW <sup>-1</sup> ) |                             |                           | HCO <sub>3</sub> <sup>-</sup> (µmol kg SW <sup>-1</sup> ) |                               |                             | CO <sub>2</sub> (µmol kg SW <sup>-1</sup> ) |                           |                           |
|-----|---------------------------------|-------------------------------|-----------------------------|-----------------------------------------------------------|-----------------------------|---------------------------|-----------------------------------------------------------|-------------------------------|-----------------------------|---------------------------------------------|---------------------------|---------------------------|
|     | HC-LP                           | LC-HP                         | LC-LP                       | HC-LP                                                     | LC-HP                       | LC-LP                     | HC-LP                                                     | LC-HP                         | LC-LP                       | HC-LP                                       | LC-HP                     | LC-LP                     |
| 0   | 1576.96 ± 53.75 <sup>b</sup>    | 1558.32 ± 146.21 <sup>b</sup> | 947.70 ± 76.87 <sup>a</sup> | 49.93 ± 2.78 <sup>a</sup>                                 | 114.63 ± 9.19 <sup>b</sup>  | 30.91 ± 1.24 <sup>c</sup> | 1492.23 ± 50.10 <sup>b</sup>                              | 1430.21 ± 135.69 <sup>b</sup> | 896.61 ± 73.42 <sup>a</sup> | 34.80 ± 0.96 <sup>a</sup>                   | 13.46 ± 1.34 <sup>b</sup> | 20.17 ± 2.30 <sup>c</sup> |
| 1   | 1571.37 ± 81.41 <sup>b</sup>    | 1557.04 ± 5.91 <sup>b</sup>   | 867.68 ± 28.39 <sup>a</sup> | 38.05 ± 8.78 <sup>b</sup>                                 | 83.61 ± 5.61 <sup>a</sup>   | 22.12 ± 2.99 <sup>b</sup> | 1491.36 ± 75.56 <sup>b</sup>                              | 1455.75 ± 10.01 <sup>b</sup>  | 824.07 ± 27.11 <sup>a</sup> | 41.96 ± 3.04 <sup>a</sup>                   | 17.68 ± 1.51 <sup>b</sup> | 21.49 ± 4.04 <sup>b</sup> |
| 2   | 1492.73 ± 63.31 <sup>b</sup>    | 1633.64 ± 18.16 <sup>b</sup>  | 756.53 ± 82.06 <sup>a</sup> | 27.27 ± 0.70 <sup>a</sup>                                 | 85.93 ± 4.69 <sup>b</sup>   | 14.64 ± 3.72 <sup>c</sup> | 1414.75 ± 59.30 <sup>b</sup>                              | 1528.70 ± 14.52 <sup>b</sup>  | 717.13 ± 79.29 <sup>a</sup> | 50.71 ± 4.58 <sup>a</sup>                   | 19.01 ± 0.61 <sup>b</sup> | 24.75 ± 3.17 <sup>b</sup> |
| 3   | 1469.15 ± 57.88 <sup>a</sup>    | 1811.71 ± 48.43 <sup>b</sup>  | 789.16 ± 23.35 <sup>c</sup> | 45.78 ± 1.22 <sup>a</sup>                                 | 147.36 ± 1.15 <sup>b</sup>  | 17.56 ± 3.86 <sup>c</sup> | 1393.91 ± 56.13 <sup>a</sup>                              | 1651.30 ± 48.32 <sup>b</sup>  | 748.75 ± 21.97 <sup>c</sup> | 29.46 ± 2.29 <sup>ab</sup>                  | 13.04 ± 0.75 <sup>b</sup> | 22.86 ± 6.09 <sup>b</sup> |
| 4   | 1388.73 ± 177.52 <sup>b</sup>   | 1650.86 ± 16.94 <sup>b</sup>  | 748.47 ± 20.46 <sup>a</sup> | 52.53 ± 6.15 <sup>a</sup>                                 | 154.30 ± 1.73 <sup>b</sup>  | 26.78 ± 2.09 <sup>c</sup> | 1313.56 ± 168.55 <sup>b</sup>                             | 1486.63 ± 17.46 <sup>b</sup>  | 708.60 ± 20.83 <sup>a</sup> | 22.64 ± 2.81 <sup>a</sup>                   | 9.93 ± 0.32 <sup>b</sup>  | 13.10 ± 1.72 <sup>b</sup> |
| 5   | 1357.21 ± 70.64 <sup>b</sup>    | 1234.30 ± 161.29 <sup>b</sup> | 476.91 ± 72.10 <sup>a</sup> | 50.21 ± 5.40 <sup>b</sup>                                 | 123.60 ± 21.57 <sup>a</sup> | 16.55 ± 2.11 <sup>b</sup> | 1283.73 ± 65.07 <sup>b</sup>                              | 1103.55 ± 156.36 <sup>b</sup> | 451.24 ± 70.25 <sup>a</sup> | 23.27 ± 0.31 <sup>a</sup>                   | 7.15 ± 2.13 <sup>b</sup>  | 9.02 ± 3.35 <sup>b</sup>  |
| 7   | 1208.16 ± 136.32 <sup>a</sup>   | 604.07 ± 142.74 <sup>b</sup>  | 450.28 ± 16.34 <sup>b</sup> | 34.62 ± 8.98 <sup>ab</sup>                                | 38.38 ± 12.69 <sup>a</sup>  | 13.97 ± 1.42 <sup>b</sup> | 1146.19 ± 128.65 <sup>a</sup>                             | 559.50 ± 134.52 <sup>b</sup>  | 427.00 ± 15.87 <sup>b</sup> | 27.35 ± 2.19 <sup>a</sup>                   | 6.19 ± 2.90 <sup>b</sup>  | 9.32 ± 1.46 <sup>b</sup>  |
| 9   | 641.15 ± 73.34 <sup>a</sup>     | 391.80 ± 24.27 <sup>b</sup>   | 382.38 ± 9.43 <sup>b</sup>  | 16.98 ± 0.17 <sup>b</sup>                                 | 31.56 ± 6.56 <sup>a</sup>   | 11.43 ± 0.43 <sup>b</sup> | 607.93 ± 69.37 <sup>a</sup>                               | 357.54 ± 19.53 <sup>b</sup>   | 362.36 ± 8.89 <sup>b</sup>  | 16.24 ± 3.92 <sup>a</sup>                   | 2.70 ± 0.06 <sup>b</sup>  | 8.60 ± 0.10 <sup>b</sup>  |

**Table S1.** Carbonate system. Measured pH, total alkalinity and calculated dissolved inorganic carbon (DIC), calcite saturation estate (Ω<sub>calcite</sub>), CO<sub>3</sub><sup>2-</sup>, HCO<sub>3</sub><sup>-</sup>, CO<sub>2</sub> and pCO<sub>2</sub> in the different treatments; HC-LP (pCO<sub>2</sub>: 1000-1200 µatm; pH: 7.6-7.8), LC-HP (pCO<sub>2</sub>: 380-390 µatm; pH: 8.2) and LC-LP (pCO<sub>2</sub>: 380-390 µatm; pH: 7.6-7.8). Values are mean ± SD (n = 3). Significant differences between treatments are indicated by different letters for any given time (p < 0.05).

| Day | <i>L</i>                 |                           |                           | <i>W</i>                 |                           |                           |
|-----|--------------------------|---------------------------|---------------------------|--------------------------|---------------------------|---------------------------|
|     | HC-LP                    | LC-HP                     | LC-LP                     | HC-LP                    | LC-HP                     | LC-LP                     |
| 0   | 6.39 ± 0.73 <sup>b</sup> | 7.32 ± 0.66 <sup>a</sup>  | 6.06 ± 0.89 <sup>b</sup>  | 5.98 ± 0.47 <sup>b</sup> | 7.04 ± 0.61 <sup>a</sup>  | 5.72 ± 0.91 <sup>b</sup>  |
| 1   | 7.63 ± 0.88 <sup>b</sup> | 7.28 ± 1.07 <sup>ab</sup> | 6.96 ± 0.68 <sup>a</sup>  | 7.12 ± 0.78 <sup>b</sup> | 6.78 ± 0.87 <sup>ab</sup> | 6.50 ± 0.70 <sup>a</sup>  |
| 2   | 7.47 ± 0.94 <sup>b</sup> | 6.58 ± 0.89 <sup>a</sup>  | 7.08 ± 0.88 <sup>ab</sup> | 6.99 ± 0.95 <sup>b</sup> | 6.18 ± 0.76 <sup>a</sup>  | 6.63 ± 0.69 <sup>ab</sup> |
| 4   | 8.22 ± 0.97 <sup>a</sup> | 6.94 ± 0.69 <sup>b</sup>  | 7.33 ± 1.31 <sup>b</sup>  | 7.71 ± 0.80 <sup>a</sup> | 6.52 ± 0.61 <sup>b</sup>  | 6.82 ± 1.10 <sup>b</sup>  |
| 7   | 5.78 ± 0.53 <sup>a</sup> | 5.29 ± 0.36 <sup>a</sup>  | 5.65 ± 0.81 <sup>a</sup>  | 5.26 ± 0.55 <sup>a</sup> | 4.99 ± 0.53 <sup>a</sup>  | 5.08 ± 0.78 <sup>a</sup>  |

**Table S2.** Variation of the morphology of the coccospheres in HC-LP, LC-HP, and LC-LP treatments. *L*, length of the coccosphere (μm); *W*, width of the coccosphere (μm). Values are mean ± SD (30 micrographs of coccoliths and coccospheres were analysed for every treatment and day). Significant differences between treatments are indicated by different letters for any given time ( $p < 0.05$ ).

| Day | DL                       |                          |                          | DW                       |                          |                          | CAL                      |                          |                          | CAW                      |                          |                          | Seg.                      |                           |                           |
|-----|--------------------------|--------------------------|--------------------------|--------------------------|--------------------------|--------------------------|--------------------------|--------------------------|--------------------------|--------------------------|--------------------------|--------------------------|---------------------------|---------------------------|---------------------------|
|     | HC-LP                    | LC-HP                    | LC-LP                    | HC-LP                    | LC-HP                    | LC-LP                    | HC-LP                    | LC-HP                    | LC-LP                    | HC-LP                    | LC-HP                    | LC-LP                    | HC-LP                     | LC-HP                     | LC-LP                     |
| 0   | 3.20 ± 0.25 <sup>a</sup> | 3.69 ± 0.78 <sup>a</sup> | 3.43 ± 0.28 <sup>a</sup> | 2.67 ± 0.19 <sup>a</sup> | 3.12 ± 0.59 <sup>a</sup> | 2.87 ± 0.34 <sup>a</sup> | 1.40 ± 0.08 <sup>a</sup> | 1.66 ± 0.38 <sup>a</sup> | 1.47 ± 0.15 <sup>a</sup> | 0.75 ± 0.13 <sup>a</sup> | 0.91 ± 0.19 <sup>a</sup> | 0.88 ± 0.18 <sup>a</sup> | 25.33 ± 4.27 <sup>a</sup> | 26.33 ± 5.16 <sup>a</sup> | 23.04 ± 4.32 <sup>a</sup> |
| 1   | 3.44 ± 0.30 <sup>b</sup> | 3.44 ± 0.26 <sup>b</sup> | 3.18 ± 0.30 <sup>a</sup> | 2.92 ± 0.34 <sup>b</sup> | 2.92 ± 0.25 <sup>b</sup> | 2.69 ± 0.30 <sup>a</sup> | 1.50 ± 0.19 <sup>a</sup> | 1.60 ± 0.19 <sup>b</sup> | 1.47 ± 0.19 <sup>b</sup> | 0.89 ± 0.20 <sup>a</sup> | 0.95 ± 0.16 <sup>a</sup> | 0.92 ± 0.16 <sup>a</sup> | 25.57 ± 5.68 <sup>a</sup> | 25.07 ± 4.21 <sup>a</sup> | 24.63 ± 5.49 <sup>a</sup> |
| 2   | 3.28 ± 0.35 <sup>a</sup> | 3.27 ± 0.30 <sup>a</sup> | 3.18 ± 0.32 <sup>a</sup> | 2.79 ± 0.34 <sup>a</sup> | 2.76 ± 0.28 <sup>a</sup> | 2.65 ± 0.33 <sup>a</sup> | 1.59 ± 0.25 <sup>a</sup> | 1.63 ± 0.18 <sup>a</sup> | 1.56 ± 0.22 <sup>a</sup> | 0.94 ± 0.21 <sup>a</sup> | 0.92 ± 0.15 <sup>a</sup> | 0.94 ± 0.16 <sup>a</sup> | 26.00 ± 4.74 <sup>a</sup> | 24.96 ± 5.15 <sup>a</sup> | 24.38 ± 3.11 <sup>a</sup> |
| 4   | 3.33 ± 0.35 <sup>a</sup> | 3.39 ± 0.24 <sup>a</sup> | 3.27 ± 0.36 <sup>a</sup> | 2.82 ± 0.37 <sup>a</sup> | 2.87 ± 0.28 <sup>a</sup> | 2.76 ± 0.36 <sup>a</sup> | 1.58 ± 0.23 <sup>a</sup> | 1.64 ± 0.18 <sup>a</sup> | 1.56 ± 0.36 <sup>a</sup> | 0.97 ± 0.19 <sup>a</sup> | 0.95 ± 0.17 <sup>a</sup> | 0.96 ± 0.17 <sup>a</sup> | 23.69 ± 5.03 <sup>a</sup> | 26.00 ± 4.61 <sup>a</sup> | 25.64 ± 5.31 <sup>a</sup> |
| 7   | 3.41 ± 0.29 <sup>a</sup> | 3.16 ± 0.32 <sup>b</sup> | 3.12 ± 0.28 <sup>b</sup> | 2.88 ± 0.25 <sup>a</sup> | 2.67 ± 0.31 <sup>b</sup> | 2.63 ± 0.28 <sup>b</sup> | 1.58 ± 0.18 <sup>a</sup> | 1.54 ± 0.18 <sup>a</sup> | 1.52 ± 0.20 <sup>a</sup> | 0.98 ± 0.16 <sup>a</sup> | 0.91 ± 0.19 <sup>a</sup> | 0.88 ± 0.16 <sup>a</sup> | 25.78 ± 4.84 <sup>a</sup> | 23.64 ± 5.29 <sup>a</sup> | 24.04 ± 5.02 <sup>a</sup> |

| Day | DSA                      |                          |                          | CSA                      |                          |                          | OSL                      |                          |                          | TW <sub>relative</sub>   |                           |                          | m                        |                           |                          |
|-----|--------------------------|--------------------------|--------------------------|--------------------------|--------------------------|--------------------------|--------------------------|--------------------------|--------------------------|--------------------------|---------------------------|--------------------------|--------------------------|---------------------------|--------------------------|
|     | HC-LP                    | LC-HP                    | LC-LP                    | HC-LP                    | LC-HP                    | LC-LP                    | HC-LP                    | LC-HP                    | LC-LP                    | HC-LP                    | LC-HP                     | LC-LP                    | HC-LP                    | LC-HP                     | LC-LP                    |
| 0   | 6.73 ± 0.99 <sup>a</sup> | 9.35 ± 4.25 <sup>a</sup> | 7.79 ± 1.51 <sup>a</sup> | 0.83 ± 0.17 <sup>a</sup> | 1.23 ± 0.56 <sup>a</sup> | 1.02 ± 0.27 <sup>a</sup> | 0.93 ± 0.10 <sup>a</sup> | 1.06 ± 0.22 <sup>a</sup> | 0.99 ± 0.10 <sup>a</sup> | 0.20 ± 0.03 <sup>b</sup> | 0.24 ± 0.02 <sup>a</sup>  | 0.20 ± 0.03 <sup>b</sup> | 2.69 ± 0.65 <sup>a</sup> | 3.43 ± 0.96 <sup>a</sup>  | 3.31 ± 0.81 <sup>a</sup> |
| 1   | 7.90 ± 1.58 <sup>b</sup> | 7.93 ± 1.23 <sup>b</sup> | 6.77 ± 1.41 <sup>a</sup> | 1.07 ± 0.38 <sup>a</sup> | 1.21 ± 0.33 <sup>a</sup> | 1.07 ± 0.30 <sup>a</sup> | 0.99 ± 0.11 <sup>b</sup> | 0.95 ± 0.11 <sup>b</sup> | 0.87 ± 0.12 <sup>a</sup> | 0.24 ± 0.04 <sup>b</sup> | 0.23 ± 0.04 <sup>ab</sup> | 0.21 ± 0.03 <sup>a</sup> | 3.37 ± 0.90 <sup>b</sup> | 3.34 ± 0.76 <sup>b</sup>  | 2.67 ± 0.78 <sup>a</sup> |
| 2   | 7.27 ± 1.61 <sup>a</sup> | 7.14 ± 1.36 <sup>a</sup> | 6.70 ± 1.51 <sup>a</sup> | 1.21 ± 0.44 <sup>a</sup> | 1.18 ± 0.30 <sup>a</sup> | 1.17 ± 0.33 <sup>a</sup> | 0.88 ± 0.10 <sup>a</sup> | 0.87 ± 0.10 <sup>a</sup> | 0.83 ± 0.11 <sup>a</sup> | 0.24 ± 0.04 <sup>b</sup> | 0.24 ± 0.04 <sup>b</sup>  | 0.21 ± 0.03 <sup>a</sup> | 2.95 ± 0.93 <sup>a</sup> | 2.90 ± 0.79 <sup>a</sup>  | 2.68 ± 0.83 <sup>a</sup> |
| 4   | 7.48 ± 1.82 <sup>a</sup> | 7.72 ± 1.48 <sup>a</sup> | 7.17 ± 1.72 <sup>a</sup> | 1.22 ± 0.40 <sup>a</sup> | 1.23 ± 0.33 <sup>a</sup> | 1.19 ± 0.34 <sup>a</sup> | 0.90 ± 0.13 <sup>a</sup> | 0.92 ± 0.13 <sup>a</sup> | 0.88 ± 0.16 <sup>a</sup> | 0.20 ± 0.04 <sup>b</sup> | 0.26 ± 0.09 <sup>a</sup>  | 0.19 ± 0.04 <sup>b</sup> | 2.98 ± 0.70 <sup>a</sup> | 3.23 ± 0.86 <sup>a</sup>  | 2.95 ± 0.88 <sup>a</sup> |
| 7   | 7.77 ± 1.32 <sup>a</sup> | 6.71 ± 1.47 <sup>b</sup> | 6.49 ± 1.26 <sup>b</sup> | 1.23 ± 0.32 <sup>a</sup> | 1.12 ± 0.34 <sup>a</sup> | 1.07 ± 0.31 <sup>a</sup> | 0.93 ± 0.11 <sup>a</sup> | 0.85 ± 0.11 <sup>b</sup> | 0.84 ± 0.11 <sup>b</sup> | 0.21 ± 0.04 <sup>a</sup> | 0.22 ± 0.07 <sup>a</sup>  | 0.21 ± 0.03 <sup>a</sup> | 3.28 ± 0.83 <sup>b</sup> | 2.59 ± 0.62 <sup>ab</sup> | 2.51 ± 0.68 <sup>a</sup> |

| Day | DR                        |                           |                           | CAR                        |                            |                           |
|-----|---------------------------|---------------------------|---------------------------|----------------------------|----------------------------|---------------------------|
|     | HC-LP                     | LC-HP                     | LC-LP                     | HC-LP                      | LC-HP                      | LC-LP                     |
| 0   | 83.56 ± 2.67 <sup>a</sup> | 84.93 ± 3.27 <sup>a</sup> | 83.69 ± 4.43 <sup>a</sup> | 53.74 ± 8.09 <sup>a</sup>  | 55.19 ± 7.06 <sup>a</sup>  | 59.95 ± 9.81 <sup>a</sup> |
| 1   | 84.75 ± 3.71 <sup>a</sup> | 85.08 ± 3.30 <sup>a</sup> | 84.32 ± 2.94 <sup>a</sup> | 58.87 ± 8.97 <sup>a</sup>  | 59.60 ± 6.94 <sup>a</sup>  | 62.41 ± 7.46 <sup>a</sup> |
| 2   | 84.89 ± 3.74 <sup>a</sup> | 84.42 ± 3.57 <sup>a</sup> | 83.17 ± 3.59 <sup>a</sup> | 58.95 ± 7.27 <sup>ab</sup> | 56.36 ± 6.56 <sup>a</sup>  | 60.48 ± 6.22 <sup>b</sup> |
| 4   | 84.60 ± 3.55 <sup>a</sup> | 84.86 ± 3.50 <sup>a</sup> | 84.49 ± 4.57 <sup>a</sup> | 61.24 ± 7.48 <sup>a</sup>  | 57.86 ± 8.99 <sup>a</sup>  | 61.65 ± 8.42 <sup>a</sup> |
| 7   | 84.54 ± 2.12 <sup>a</sup> | 84.42 ± 3.08 <sup>a</sup> | 84.21 ± 3.12 <sup>a</sup> | 62.47 ± 7.35 <sup>b</sup>  | 58.75 ± 7.64 <sup>ab</sup> | 57.89 ± 7.46 <sup>a</sup> |

**Table S3.** Variation of the morphology of the coccoliths in HC-LP, LC-HP, and LC-LP treatments. DL, length of the distal plate (µm); DW, width of the distal plate (µm); CAL, center area length (µm); CAW, width of the central area (µm); Seg., number of segments; DSA, surface area of the distal shield (µm<sup>2</sup>); CSA, surface area of the central shield (µm<sup>2</sup>); OSL, distal shield width (µm); TW<sub>relative</sub>, relative width of the tube; m, coccolith mass (pg), DR, roundness of the distal shield (%); CAR, roundness of the central area (%). Values are mean ± SD (30 micrographs of coccoliths and coccospores were analysed for every treatment and day). Significant differences between treatments are indicated by different letters for any given time (p < 0.05).

**Table S4.** Statistical analyses (Split-Plot ANOVA followed by post-hoc Sidak and Bonferroni tests) of the effects of treatments, as well as the effect of time, on the variables analysed in the different treatments during the experiment. Statistically significant differences ( $p < 0.05$ ) are indicated with an asterisk (\*); ns: not significant ( $p > 0.05$ ).

| Factor/variable                                                               | Treatment | Time     | Treatment x Time |
|-------------------------------------------------------------------------------|-----------|----------|------------------|
| Cellular density (cells · ml <sup>-1</sup> )                                  | < 0.001*  | < 0.001* | < 0.001*         |
| Chl a (pg · cells <sup>-1</sup> )                                             | < 0.001*  | < 0.001* | < 0.001*         |
| Fv/F <sub>M</sub>                                                             | < 0.001*  | < 0.001* | < 0.001*         |
| Cell viability (%)                                                            | < 0.001*  | < 0.001* | < 0.001*         |
| Oxidative stress (%)                                                          | < 0.001*  | < 0.001* | < 0.001*         |
| TPC (μmol · L <sup>-1</sup> )                                                 | < 0.001*  | < 0.001* | < 0.001*         |
| POC (μmol · L <sup>-1</sup> )                                                 | < 0.001*  | < 0.001* | < 0.001*         |
| PIC (μmol · L <sup>-1</sup> )                                                 | = 0.003*  | < 0.001* | = 0.007*         |
| PIC:POC ratio (mol: mol)                                                      | = 0.001*  | ns       | = 0.002*         |
| α <sub>ETR</sub> (e <sup>-</sup> · photons <sup>-1</sup> )                    | = 0.001*  | < 0.001* | < 0.001*         |
| ETR <sub>max</sub> (μmol e <sup>-</sup> · m <sup>-2</sup> · s <sup>-1</sup> ) | = 0.024*  | < 0.001* | < 0.001*         |
| E <sub>k</sub> (μmol photons · m <sup>-2</sup> · s <sup>-1</sup> )            | ns        | < 0.001* | < 0.001*         |
| E <sub>opt</sub> ETR (μmol photons · m <sup>-2</sup> · s <sup>-1</sup> )      | ns        | ns       | ns               |
| pH (NBS Scale)                                                                | < 0.001*  | < 0.001* | ns               |
| TA (μmol · kg · SW <sup>-1</sup> )                                            | < 0.001*  | < 0.001* | < 0.001*         |
| DIC (μmol kg · SW <sup>-1</sup> )                                             | < 0.001*  | < 0.001* | < 0.001*         |
| Ω <sub>calcite</sub>                                                          | < 0.001*  | < 0.001* | < 0.001*         |
| CO <sub>3</sub> <sup>2-</sup> (μmol kg · SW <sup>-1</sup> )                   | < 0.001*  | < 0.001* | < 0.001*         |
| HCO <sub>3</sub> <sup>-</sup> (μmol kg · SW <sup>-1</sup> )                   | < 0.001*  | < 0.001* | < 0.001*         |
| CO <sub>2</sub> (μmol kg · SW <sup>-1</sup> )                                 | < 0.001*  | < 0.001* | = 0.026*         |
| pCO <sub>2</sub> (μatm)                                                       | < 0.001*  | < 0.001* | = 0.039*         |
| L (μm)                                                                        | ns        | ns       | = 0.003*         |
| W (μm)                                                                        | ns        | < 0.001* | = 0.049*         |
| DL (μm)                                                                       | = 0.050*  | = 0.049* | = 0.032*         |
| DW (μm)                                                                       | ns        | = 0.050* | = 0.013*         |
| CAL (μm)                                                                      | ns        | ns       | = 0.002*         |
| CAW (μm)                                                                      | ns        | ns       | = 0.003*         |
| Seg. (number of segments)                                                     | ns        | = 0.037* | ns               |
| DSA (μm <sup>2</sup> )                                                        | ns        | = 0.043* | = 0.022*         |
| CSA (μm <sup>2</sup> )                                                        | ns        | ns       | = 0.002*         |
| OSL (μm)                                                                      | ns        | = 0.002* | ns               |
| TW <sub>relative</sub>                                                        | < 0.001*  | ns       | ns               |
| m (pg)                                                                        | ns        | ns       | ns               |
| DR (%)                                                                        | ns        | ns       | ns               |
| CAR (%)                                                                       | ns        | ns       | = 0.013*         |
| POC (pg cell <sup>-1</sup> )                                                  | < 0.001*  | < 0.001* | < 0.001*         |
| PIC (pg cell <sup>-1</sup> )                                                  | < 0.001*  | < 0.001* | < 0.001*         |



| Factor/variable                                                               | HC-LP vs. LC-LP | HC-LP vs. LC-HP | LC-LP vs. LC-HP |
|-------------------------------------------------------------------------------|-----------------|-----------------|-----------------|
| Cellular density (cells · ml <sup>-1</sup> )                                  | < 0.001*        | < 0.001*        | < 0.001*        |
| Chl a (pg · cells <sup>-1</sup> )                                             | = 0.003*        | < 0.001*        | = 0.001*        |
| F <sub>V</sub> /F <sub>M</sub>                                                | < 0.001*        | < 0.001*        | ns              |
| Cell viability (%)                                                            | < 0.001*        | < 0.001*        | < 0.001*        |
| Oxidative stress (%)                                                          | < 0.001*        | < 0.001*        | ns              |
| TPC (μmol · L <sup>-1</sup> )                                                 | = 0.004*        | < 0.001*        | = 0.007*        |
| POC (μmol · L <sup>-1</sup> )                                                 | < 0.001*        | < 0.001*        | < 0.001*        |
| PIC (μmol · L <sup>-1</sup> )                                                 | ns              | = 0.003*        | = 0.039*        |
| PIC:POC ratio (mol: mol)                                                      | = 0.011*        | = 0.001*        | ns              |
| α <sub>ETR</sub> (e <sup>-</sup> · photons <sup>-1</sup> )                    | = 0.006*        | = 0.003*        | ns              |
| ETR <sub>max</sub> (μmol e <sup>-</sup> · m <sup>-2</sup> · s <sup>-1</sup> ) | ns              | = 0.027*        | ns              |
| E <sub>k</sub> (μmol photons · m <sup>-2</sup> · s <sup>-1</sup> )            | ns              | ns              | ns              |
| E <sub>opt</sub> ETR (μmol photons · m <sup>-2</sup> · s <sup>-1</sup> )      | ns              | ns              | ns              |
| pH (NBS Scale)                                                                | ns              | < 0.001*        | < 0.001*        |
| TA (μmol · kg · SW <sup>-1</sup> )                                            | < 0.001*        | ns              | < 0.001*        |
| DIC (μmol kg · SW <sup>-1</sup> )                                             | < 0.001*        | ns              | < 0.001*        |
| Ω <sub>calcite</sub>                                                          | = 0.003*        | < 0.001*        | < 0.001*        |
| CO <sub>3</sub> <sup>2-</sup> (μmol kg · SW <sup>-1</sup> )                   | = 0.004*        | < 0.001*        | < 0.001*        |
| HCO <sub>3</sub> <sup>-</sup> (μmol kg · SW <sup>-1</sup> )                   | < 0.001*        | ns              | < 0.001*        |
| CO <sub>2</sub> (μmol kg · SW <sup>-1</sup> )                                 | < 0.001*        | < 0.001*        | = 0.006*        |
| pCO <sub>2</sub> (μatm)                                                       | < 0.001*        | < 0.001*        | = 0.003*        |
| L (μm)                                                                        | ns              | ns              | ns              |
| W (μm)                                                                        | ns              | ns              | ns              |
| DL (μm)                                                                       | ns              | ns              | ns              |
| DW (μm)                                                                       | ns              | ns              | ns              |
| CAL (μm)                                                                      | ns              | ns              | ns              |
| CAW (μm)                                                                      | ns              | ns              | ns              |
| Seg. (number of segments)                                                     | ns              | ns              | ns              |
| DSA (μm <sup>2</sup> )                                                        | ns              | ns              | ns              |
| CSA (μm <sup>2</sup> )                                                        | ns              | ns              | ns              |
| OSL (μm)                                                                      | ns              | ns              | ns              |
| TW <sub>relative</sub>                                                        | ns              | = 0.008*        | < 0.001*        |
| m (pg)                                                                        | ns              | ns              | ns              |
| DR (%)                                                                        | ns              | ns              | ns              |
| CAR (%)                                                                       | ns              | ns              | ns              |
| POC (pg cell <sup>-1</sup> )                                                  | < 0.001*        | < 0.001*        | ns              |
| PIC (pg cell <sup>-1</sup> )                                                  | < 0.001*        | < 0.001*        | ns              |

|                        |                 | Cellular density<br>(cells · ml <sup>-1</sup> ) | Chl a<br>(pg · cells <sup>-1</sup> ) | F <sub>v</sub> /F <sub>M</sub> | Cell viability<br>(%) | Oxidative stress<br>(%) |
|------------------------|-----------------|-------------------------------------------------|--------------------------------------|--------------------------------|-----------------------|-------------------------|
| d <sub>0</sub> (0 h)   | HC-LP vs. LC-LP | -                                               | -                                    | < 0.001*                       | < 0.001*              | ns                      |
|                        | HC-LP vs. LC-HP | -                                               | -                                    | < 0.001*                       | < 0.001*              | ns                      |
|                        | LC-LP vs. LC-HP | -                                               | -                                    | = 0.003*                       | < 0.001*              | ns                      |
| d <sub>1</sub> (24 h)  | HC-LP vs. LC-LP | < 0.001*                                        | -                                    | -                              | -                     | -                       |
|                        | HC-LP vs. LC-HP | < 0.001*                                        | -                                    | -                              | -                     | -                       |
|                        | LC-LP vs. LC-HP | = 0.002*                                        | -                                    | -                              | -                     | -                       |
| d <sub>2</sub> (48 h)  | HC-LP vs. LC-LP | < 0.001*                                        | ns                                   | < 0.001*                       | < 0.001*              | ns                      |
|                        | HC-LP vs. LC-HP | < 0.001*                                        | = 0.006*                             | < 0.001*                       | ns                    | = 0.001*                |
|                        | LC-LP vs. LC-HP | = 0.621                                         | ns                                   | ns                             | < 0.001*              | < 0.001*                |
| d <sub>3</sub> (72 h)  | HC-LP vs. LC-LP | < 0.001*                                        | -                                    | -                              | -                     | -                       |
|                        | HC-LP vs. LC-HP | < 0.001*                                        | -                                    | -                              | -                     | -                       |
|                        | LC-LP vs. LC-HP | = 0.401                                         | -                                    | -                              | -                     | -                       |
| d <sub>4</sub> (96 h)  | HC-LP vs. LC-LP | < 0.001*                                        | = 0.011*                             | = 0.042*                       | < 0.001*              | < 0.001*                |
|                        | HC-LP vs. LC-HP | < 0.001*                                        | = 0.002*                             | ns                             | < 0.001*              | < 0.001*                |
|                        | LC-LP vs. LC-HP | < 0.001*                                        | ns                                   | ns                             | < 0.001*              | = 0.001*                |
| d <sub>5</sub> (120 h) | HC-LP vs. LC-LP | < 0.001*                                        | -                                    | -                              | -                     | -                       |
|                        | HC-LP vs. LC-HP | < 0.001*                                        | -                                    | -                              | -                     | -                       |
|                        | LC-LP vs. LC-HP | < 0.001*                                        | -                                    | -                              | -                     | -                       |
| d <sub>7</sub> (168 h) | HC-LP vs. LC-LP | < 0.001*                                        | = 0.033*                             | = 0.002*                       | < 0.001*              | < 0.001*                |
|                        | HC-LP vs. LC-HP | < 0.001*                                        | = 0.002*                             | = 0.020*                       | < 0.001*              | < 0.001*                |
|                        | LC-LP vs. LC-HP | < 0.001*                                        | ns                                   | ns                             | < 0.001*              | < 0.001*                |
| d <sub>8</sub> (192 h) | HC-LP vs. LC-LP | < 0.001*                                        | -                                    | -                              | -                     | -                       |
|                        | HC-LP vs. LC-HP | < 0.001*                                        | -                                    | -                              | -                     | -                       |
|                        | LC-LP vs. LC-HP | = 0.002*                                        | -                                    | -                              | -                     | -                       |
| d <sub>9</sub> (216 h) | HC-LP vs. LC-LP | < 0.001*                                        | = 0.010*                             | = 0.017*                       | < 0.001*              | < 0.001*                |
|                        | HC-LP vs. LC-HP | < 0.001*                                        | < 0.001*                             | ns                             | < 0.001*              | < 0.001*                |
|                        | LC-LP vs. LC-HP | < 0.001*                                        | = 0.001*                             | ns                             | < 0.001*              | = 0.001*                |

|                        |                 | TPC<br>(μmol · L <sup>-1</sup> ) | POC<br>(μmol · L <sup>-1</sup> ) | PIC<br>(μmol · L <sup>-1</sup> ) | PIC:POC ratio<br>(mol: mol) | α <sub>ETR</sub><br>(e <sup>-</sup> · photons <sup>-1</sup> ) | rETR <sub>max</sub><br>(μmol e <sup>-</sup> · m <sup>-2</sup> · s <sup>-1</sup> ) |
|------------------------|-----------------|----------------------------------|----------------------------------|----------------------------------|-----------------------------|---------------------------------------------------------------|-----------------------------------------------------------------------------------|
| d <sub>0</sub> (0 h)   | HC-LP vs. LC-LP | < 0.001*                         | ns                               | < 0.001*                         | < 0.001*                    | < 0.001*                                                      | = 0.001*                                                                          |
|                        | HC-LP vs. LC-HP | ns                               | ns                               | = 0.007*                         | < 0.001*                    | < 0.001*                                                      | < 0.001*                                                                          |
|                        | LC-LP vs. LC-HP | < 0.001*                         | ns                               | < 0.001*                         | = 0.001*                    | ns                                                            | ns                                                                                |
| d <sub>1</sub> (24 h)  | HC-LP vs. LC-LP | -                                | -                                | -                                | -                           | -                                                             | -                                                                                 |
|                        | HC-LP vs. LC-HP | -                                | -                                | -                                | -                           | -                                                             | -                                                                                 |
|                        | LC-LP vs. LC-HP | -                                | -                                | -                                | -                           | -                                                             | -                                                                                 |
| d <sub>2</sub> (48 h)  | HC-LP vs. LC-LP | ns                               | ns                               | ns                               | ns                          | = 0.012*                                                      | = 0.004*                                                                          |
|                        | HC-LP vs. LC-HP | ns                               | ns                               | ns                               | ns                          | = 0.036*                                                      | ns                                                                                |
|                        | LC-LP vs. LC-HP | ns                               | ns                               | ns                               | ns                          | ns                                                            | ns                                                                                |
| d <sub>3</sub> (72 h)  | HC-LP vs. LC-LP | -                                | -                                | -                                | -                           | -                                                             | -                                                                                 |
|                        | HC-LP vs. LC-HP | -                                | -                                | -                                | -                           | -                                                             | -                                                                                 |
|                        | LC-LP vs. LC-HP | -                                | -                                | -                                | -                           | -                                                             | -                                                                                 |
| d <sub>4</sub> (96 h)  | HC-LP vs. LC-LP | = 0.004*                         | < 0.001*                         | ns                               | ns                          | ns                                                            | ns                                                                                |
|                        | HC-LP vs. LC-HP | ns                               | < 0.001*                         | = 0.007*                         | = 0.002*                    | = 0.022*                                                      | = 0.037*                                                                          |
|                        | LC-LP vs. LC-HP | = 0.048*                         | = 0.004*                         | = 0.002*                         | = 0.014*                    | ns                                                            | ns                                                                                |
| d <sub>5</sub> (120 h) | HC-LP vs. LC-LP | -                                | -                                | -                                | -                           | -                                                             | -                                                                                 |
|                        | HC-LP vs. LC-HP | -                                | -                                | -                                | -                           | -                                                             | -                                                                                 |
|                        | LC-LP vs. LC-HP | -                                | -                                | -                                | -                           | -                                                             | -                                                                                 |
| d <sub>7</sub> (168 h) | HC-LP vs. LC-LP | = 0.037*                         | = 0.008*                         | ns                               | ns                          | ns                                                            | < 0.001*                                                                          |
|                        | HC-LP vs. LC-HP | = 0.011*                         | < 0.001*                         | = 0.015*                         | ns                          | ns                                                            | = 0.006*                                                                          |
|                        | LC-LP vs. LC-HP | ns                               | = 0.007*                         | = 0.003*                         | ns                          | ns                                                            | ns                                                                                |
| d <sub>8</sub> (192 h) | HC-LP vs. LC-LP | -                                | -                                | -                                | -                           | -                                                             | -                                                                                 |
|                        | HC-LP vs. LC-HP | -                                | -                                | -                                | -                           | -                                                             | -                                                                                 |
|                        | LC-LP vs. LC-HP | -                                | -                                | -                                | -                           | -                                                             | -                                                                                 |
| d <sub>9</sub> (216 h) | HC-LP vs. LC-LP | = 0.006*                         | < 0.001*                         | = 0.015*                         | = 0.002*                    | ns                                                            | ns                                                                                |
|                        | HC-LP vs. LC-HP | < 0.001*                         | < 0.001*                         | ns                               | = 0.002*                    | ns                                                            | ns                                                                                |
|                        | LC-LP vs. LC-HP | < 0.001*                         | < 0.001*                         | ns                               | ns                          | ns                                                            | ns                                                                                |

|                        |                 | $E_k$<br>( $\mu\text{mol photons} \cdot \text{m}^{-2} \cdot \text{s}^{-1}$ ) | $E_{\text{opt ETR}}$<br>( $\mu\text{mol photons} \cdot \text{m}^{-2} \cdot \text{s}^{-1}$ ) | pH<br>(NBS Scale) | TA<br>( $\mu\text{mol} \cdot \text{kg} \cdot \text{SW}^{-1}$ ) | DIC<br>( $\mu\text{mol kg} \cdot \text{SW}^{-1}$ ) | $\Omega_{\text{calcite}}$ |
|------------------------|-----------------|------------------------------------------------------------------------------|---------------------------------------------------------------------------------------------|-------------------|----------------------------------------------------------------|----------------------------------------------------|---------------------------|
| d <sub>0</sub> (0 h)   | HC-LP vs. LC-LP | ns                                                                           | ns                                                                                          | ns                | = 0.001*                                                       | = 0.001*                                           | = 0.031*                  |
|                        | HC-LP vs. LC-HP | ns                                                                           | ns                                                                                          | < 0.001*          | ns                                                             | ns                                                 | < 0.001*                  |
|                        | LC-LP vs. LC-HP | = 0.007*                                                                     | ns                                                                                          | < 0.001*          | < 0.001*                                                       | = 0.001*                                           | < 0.001*                  |
| d <sub>1</sub> (24 h)  | HC-LP vs. LC-LP | -                                                                            | -                                                                                           | ns                | < 0.001*                                                       | < 0.001*                                           | ns                        |
|                        | HC-LP vs. LC-HP | -                                                                            | -                                                                                           | = 0.001*          | ns                                                             | ns                                                 | < 0.001*                  |
|                        | LC-LP vs. LC-HP | -                                                                            | -                                                                                           | = 0.001*          | < 0.001*                                                       | < 0.001*                                           | < 0.001*                  |
| d <sub>2</sub> (48 h)  | HC-LP vs. LC-LP | = 0.037*                                                                     | ns                                                                                          | ns                | < 0.001*                                                       | < 0.001*                                           | = 0.013*                  |
|                        | HC-LP vs. LC-HP | ns                                                                           | ns                                                                                          | < 0.001*          | = 0.006*                                                       | ns                                                 | < 0.001*                  |
|                        | LC-LP vs. LC-HP | ns                                                                           | ns                                                                                          | < 0.001*          | < 0.001*                                                       | < 0.001*                                           | < 0.001*                  |
| d <sub>3</sub> (72 h)  | HC-LP vs. LC-LP | -                                                                            | -                                                                                           | ns                | < 0.001*                                                       | < 0.001*                                           | < 0.001*                  |
|                        | HC-LP vs. LC-HP | -                                                                            | -                                                                                           | = 0.001*          | < 0.001*                                                       | < 0.001*                                           | < 0.001*                  |
|                        | LC-LP vs. LC-HP | -                                                                            | -                                                                                           | < 0.001*          | < 0.001*                                                       | < 0.001*                                           | < 0.001*                  |
| d <sub>4</sub> (96 h)  | HC-LP vs. LC-LP | ns                                                                           | ns                                                                                          | ns                | = 0.001*                                                       | = 0.001*                                           | = 0.001*                  |
|                        | HC-LP vs. LC-HP | ns                                                                           | ns                                                                                          | < 0.001*          | = 0.007*                                                       | ns                                                 | < 0.001*                  |
|                        | LC-LP vs. LC-HP | ns                                                                           | ns                                                                                          | < 0.001*          | < 0.001*                                                       | < 0.001*                                           | < 0.001*                  |
| d <sub>5</sub> (120 h) | HC-LP vs. LC-LP | -                                                                            | -                                                                                           | ns                | < 0.001*                                                       | < 0.001*                                           | ns                        |
|                        | HC-LP vs. LC-HP | -                                                                            | -                                                                                           | = 0.001*          | ns                                                             | ns                                                 | = 0.001*                  |
|                        | LC-LP vs. LC-HP | -                                                                            | -                                                                                           | = 0.001*          | < 0.001*                                                       | < 0.001*                                           | < 0.001*                  |
| d <sub>7</sub> (168 h) | HC-LP vs. LC-LP | = 0.016*                                                                     | = 0.001*                                                                                    | ns                | = 0.001*                                                       | = 0.001*                                           | ns                        |
|                        | HC-LP vs. LC-HP | = 0.043*                                                                     | = 0.011*                                                                                    | < 0.001*          | = 0.004*                                                       | = 0.002*                                           | ns                        |
|                        | LC-LP vs. LC-HP | ns                                                                           | ns                                                                                          | < 0.001*          | ns                                                             | ns                                                 | = 0.048*                  |
| d <sub>8</sub> (192 h) | HC-LP vs. LC-LP | -                                                                            | -                                                                                           | -                 | -                                                              | -                                                  | -                         |
|                        | HC-LP vs. LC-HP | -                                                                            | -                                                                                           | -                 | -                                                              | -                                                  | -                         |
|                        | LC-LP vs. LC-HP | -                                                                            | -                                                                                           | -                 | -                                                              | -                                                  | -                         |
| d <sub>9</sub> (216 h) | HC-LP vs. LC-LP | = 0.015*                                                                     | ns                                                                                          | ns                | = 0.001*                                                       | = 0.001*                                           | = 0.019*                  |
|                        | HC-LP vs. LC-HP | = 0.030*                                                                     | ns                                                                                          | < 0.001*          | = 0.011*                                                       | = 0.001*                                           | < 0.001*                  |
|                        | LC-LP vs. LC-HP | ns                                                                           | ns                                                                                          | < 0.001*          | ns                                                             | ns                                                 | < 0.001*                  |

|                        |                 | $\text{CO}_3^{2-}$<br>( $\mu\text{mol kg} \cdot \text{SW}^{-1}$ ) | $\text{HCO}_3^-$<br>( $\mu\text{mol kg} \cdot \text{SW}^{-1}$ ) | $\text{CO}_2$<br>( $\mu\text{mol kg} \cdot \text{SW}^{-1}$ ) | pCO <sub>2</sub><br>( $\mu\text{atm}$ ) | L ( $\mu\text{m}$ ) | W ( $\mu\text{m}$ ) |
|------------------------|-----------------|-------------------------------------------------------------------|-----------------------------------------------------------------|--------------------------------------------------------------|-----------------------------------------|---------------------|---------------------|
| d <sub>0</sub> (0 h)   | HC-LP vs. LC-LP | = 0.018*                                                          | = 0.001*                                                        | < 0.001*                                                     | < 0.001*                                | ns                  | ns                  |
|                        | HC-LP vs. LC-HP | < 0.001*                                                          | ns                                                              | < 0.001*                                                     | < 0.001*                                | = 0.034*            | = 0.005*            |
|                        | LC-LP vs. LC-HP | < 0.001*                                                          | = 0.001*                                                        | = 0.007*                                                     | = 0.004*                                | = 0.004*            | = 0.001*            |
| d <sub>1</sub> (24 h)  | HC-LP vs. LC-LP | ns                                                                | < 0.001*                                                        | = 0.001*                                                     | = 0.001*                                | = 0.013*            | = 0.008*            |
|                        | HC-LP vs. LC-HP | < 0.001*                                                          | ns                                                              | < 0.001*                                                     | < 0.001*                                | ns                  | ns                  |
|                        | LC-LP vs. LC-HP | < 0.001*                                                          | < 0.001*                                                        | ns                                                           | ns                                      | ns                  | ns                  |
| d <sub>2</sub> (48 h)  | HC-LP vs. LC-LP | = 0.013*                                                          | < 0.001*                                                        | < 0.001*                                                     | < 0.001*                                | ns                  | ns                  |
|                        | HC-LP vs. LC-HP | < 0.001*                                                          | ns                                                              | < 0.001*                                                     | < 0.001*                                | = 0.001*            | = 0.001*            |
|                        | LC-LP vs. LC-HP | < 0.001*                                                          | < 0.001*                                                        | ns                                                           | ns                                      | ns                  | ns                  |
| d <sub>3</sub> (72 h)  | HC-LP vs. LC-LP | < 0.001*                                                          | < 0.001*                                                        | ns                                                           | ns                                      | -                   | -                   |
|                        | HC-LP vs. LC-HP | < 0.001*                                                          | = 0.001*                                                        | = 0.005*                                                     | = 0.005*                                | -                   | -                   |
|                        | LC-LP vs. LC-HP | < 0.001*                                                          | < 0.001*                                                        | ns                                                           | ns                                      | -                   | -                   |
| d <sub>4</sub> (96 h)  | HC-LP vs. LC-LP | = 0.001*                                                          | = 0.001*                                                        | = 0.003*                                                     | = 0.001*                                | = 0.005*            | = 0.001*            |
|                        | HC-LP vs. LC-HP | < 0.001*                                                          | ns                                                              | = 0.001*                                                     | < 0.001*                                | < 0.001*            | < 0.001*            |
|                        | LC-LP vs. LC-HP | < 0.001*                                                          | < 0.001*                                                        | ns                                                           | ns                                      | ns                  | ns                  |
| d <sub>5</sub> (120 h) | HC-LP vs. LC-LP | ns                                                                | < 0.001*                                                        | = 0.001*                                                     | = 0.001*                                | -                   | -                   |
|                        | HC-LP vs. LC-HP | = 0.001*                                                          | ns                                                              | < 0.001*                                                     | < 0.001*                                | -                   | -                   |
|                        | LC-LP vs. LC-HP | < 0.001*                                                          | = 0.001*                                                        | ns                                                           | ns                                      | -                   | -                   |
| d <sub>7</sub> (168 h) | HC-LP vs. LC-LP | ns                                                                | = 0.001*                                                        | < 0.001*                                                     | < 0.001*                                | ns                  | ns                  |
|                        | HC-LP vs. LC-HP | ns                                                                | = 0.002*                                                        | < 0.001*                                                     | < 0.001*                                | ns                  | ns                  |
|                        | LC-LP vs. LC-HP | = 0.047*                                                          | ns                                                              | ns                                                           | ns                                      | ns                  | ns                  |
| d <sub>8</sub> (192 h) | HC-LP vs. LC-LP | -                                                                 | -                                                               | -                                                            | -                                       | -                   | -                   |
|                        | HC-LP vs. LC-HP | -                                                                 | -                                                               | -                                                            | -                                       | -                   | -                   |
|                        | LC-LP vs. LC-HP | -                                                                 | -                                                               | -                                                            | -                                       | -                   | -                   |
| d <sub>9</sub> (216 h) | HC-LP vs. LC-LP | ns                                                                | = 0.001*                                                        | = 0.018*                                                     | = 0.031*                                | -                   | -                   |
|                        | HC-LP vs. LC-HP | = 0.010*                                                          | = 0.001*                                                        | = 0.001*                                                     | = 0.002*                                | -                   | -                   |
|                        | LC-LP vs. LC-HP | = 0.002*                                                          | ns                                                              | ns                                                           | ns                                      | -                   | -                   |

|                        |                 | DL ( $\mu\text{m}$ ) | DW ( $\mu\text{m}$ ) | CAL ( $\mu\text{m}$ ) | CAW ( $\mu\text{m}$ ) | Seg.<br>(number of segments) | DSA ( $\mu\text{m}^2$ ) | CSA ( $\mu\text{m}^2$ ) |
|------------------------|-----------------|----------------------|----------------------|-----------------------|-----------------------|------------------------------|-------------------------|-------------------------|
| d <sub>0</sub> (0 h)   | HC-LP vs. LC-LP | ns                   | ns                   | ns                    | ns                    | ns                           | ns                      | ns                      |
|                        | HC-LP vs. LC-HP | ns                   | ns                   | ns                    | ns                    | ns                           | ns                      | ns                      |
|                        | LC-LP vs. LC-HP | ns                   | ns                   | ns                    | ns                    | ns                           | ns                      | ns                      |
| d <sub>1</sub> (24 h)  | HC-LP vs. LC-LP | = 0.002*             | = 0.009*             | ns                    | ns                    | ns                           | = 0.005*                | ns                      |
|                        | HC-LP vs. LC-HP | ns                   | ns                   | ns                    | ns                    | ns                           | ns                      | ns                      |
|                        | LC-LP vs. LC-HP | = 0.003*             | = 0.008*             | = 0.028*              | ns                    | ns                           | = 0.007*                | ns                      |
| d <sub>2</sub> (48 h)  | HC-LP vs. LC-LP | ns                   | ns                   | ns                    | ns                    | ns                           | ns                      | ns                      |
|                        | HC-LP vs. LC-HP | ns                   | ns                   | ns                    | ns                    | ns                           | ns                      | ns                      |
|                        | LC-LP vs. LC-HP | ns                   | ns                   | ns                    | ns                    | ns                           | ns                      | ns                      |
| d <sub>3</sub> (72 h)  | HC-LP vs. LC-LP | -                    | -                    | -                     | -                     | -                            | -                       | -                       |
|                        | HC-LP vs. LC-HP | -                    | -                    | -                     | -                     | -                            | -                       | -                       |
|                        | LC-LP vs. LC-HP | -                    | -                    | -                     | -                     | -                            | -                       | -                       |
| d <sub>4</sub> (96 h)  | HC-LP vs. LC-LP | ns                   | ns                   | ns                    | ns                    | ns                           | ns                      | ns                      |
|                        | HC-LP vs. LC-HP | ns                   | ns                   | ns                    | ns                    | ns                           | ns                      | ns                      |
|                        | LC-LP vs. LC-HP | ns                   | ns                   | ns                    | ns                    | ns                           | ns                      | ns                      |
| d <sub>5</sub> (120 h) | HC-LP vs. LC-LP | -                    | -                    | -                     | -                     | -                            | -                       | -                       |
|                        | HC-LP vs. LC-HP | -                    | -                    | -                     | -                     | -                            | -                       | -                       |
|                        | LC-LP vs. LC-HP | -                    | -                    | -                     | -                     | -                            | -                       | -                       |
| d <sub>7</sub> (168 h) | HC-LP vs. LC-LP | = 0.001*             | = 0.002*             | ns                    | ns                    | ns                           | = 0.001*                | ns                      |
|                        | HC-LP vs. LC-HP | = 0.007*             | = 0.016*             | ns                    | ns                    | ns                           | = 0.010*                | ns                      |
|                        | LC-LP vs. LC-HP | ns                   | ns                   | ns                    | ns                    | ns                           | ns                      | ns                      |
| d <sub>8</sub> (192 h) | HC-LP vs. LC-LP | -                    | -                    | -                     | -                     | -                            | -                       | -                       |
|                        | HC-LP vs. LC-HP | -                    | -                    | -                     | -                     | -                            | -                       | -                       |
|                        | LC-LP vs. LC-HP | -                    | -                    | -                     | -                     | -                            | -                       | -                       |
| d <sub>9</sub> (216 h) | HC-LP vs. LC-LP | -                    | -                    | -                     | -                     | -                            | -                       | -                       |
|                        | HC-LP vs. LC-HP | -                    | -                    | -                     | -                     | -                            | -                       | -                       |
|                        | LC-LP vs. LC-HP | -                    | -                    | -                     | -                     | -                            | -                       | -                       |

|                        |                 | OSL ( $\mu\text{m}$ ) | TW <sub>relative</sub> | m (pg)   | DR (%) | CAR (%)  | POC (pg cell <sup>-1</sup> ) | PIC (pg cell <sup>-1</sup> ) |
|------------------------|-----------------|-----------------------|------------------------|----------|--------|----------|------------------------------|------------------------------|
| d <sub>0</sub> (0 h)   | HC-LP vs. LC-LP | ns                    | ns                     | ns       | ns     | ns       | ns                           | < 0.001*                     |
|                        | HC-LP vs. LC-HP | ns                    | = 0.024*               | ns       | ns     | ns       | ns                           | = 0.011*                     |
|                        | LC-LP vs. LC-HP | ns                    | = 0.017*               | ns       | ns     | ns       | ns                           | < 0.001*                     |
| d <sub>1</sub> (24 h)  | HC-LP vs. LC-LP | < 0.001*              | = 0.016*               | = 0.004* | ns     | ns       | -                            | -                            |
|                        | HC-LP vs. LC-HP | ns                    | ns                     | ns       | ns     | ns       | -                            | -                            |
|                        | LC-LP vs. LC-HP | = 0.025*              | ns                     | = 0.007* | ns     | ns       | -                            | -                            |
| d <sub>2</sub> (48 h)  | HC-LP vs. LC-LP | ns                    | = 0.003*               | ns       | ns     | ns       | < 0.001*                     | = 0.001*                     |
|                        | HC-LP vs. LC-HP | ns                    | ns                     | ns       | ns     | ns       | < 0.001*                     | = 0.001*                     |
|                        | LC-LP vs. LC-HP | ns                    | = 0.002*               | ns       | ns     | = 0.042* | ns                           | ns                           |
| d <sub>3</sub> (72 h)  | HC-LP vs. LC-LP | -                     | -                      | -        | -      | -        | -                            | -                            |
|                        | HC-LP vs. LC-HP | -                     | -                      | -        | -      | -        | -                            | -                            |
|                        | LC-LP vs. LC-HP | -                     | -                      | -        | -      | -        | -                            | -                            |
| d <sub>4</sub> (96 h)  | HC-LP vs. LC-LP | ns                    | ns                     | ns       | ns     | ns       | < 0.001*                     | = 0.001*                     |
|                        | HC-LP vs. LC-HP | ns                    | = 0.001*               | ns       | ns     | ns       | < 0.001*                     | = 0.001*                     |
|                        | LC-LP vs. LC-HP | ns                    | < 0.001*               | ns       | ns     | ns       | ns                           | ns                           |
| d <sub>5</sub> (120 h) | HC-LP vs. LC-LP | -                     | -                      | -        | -      | -        | -                            | -                            |
|                        | HC-LP vs. LC-HP | -                     | -                      | -        | -      | -        | -                            | -                            |
|                        | LC-LP vs. LC-HP | -                     | -                      | -        | -      | -        | -                            | -                            |
| d <sub>7</sub> (168 h) | HC-LP vs. LC-LP | = 0.003*              | ns                     | < 0.001* | ns     | = 0.042* | = 0.002*                     | = 0.001*                     |
|                        | HC-LP vs. LC-HP | = 0.009*              | ns                     | ns       | ns     | ns       | = 0.007*                     | < 0.001*                     |
|                        | LC-LP vs. LC-HP | ns                    | ns                     | ns       | ns     | ns       | ns                           | ns                           |
| d <sub>8</sub> (192 h) | HC-LP vs. LC-LP | -                     | -                      | -        | -      | -        | -                            | -                            |
|                        | HC-LP vs. LC-HP | -                     | -                      | -        | -      | -        | -                            | -                            |
|                        | LC-LP vs. LC-HP | -                     | -                      | -        | -      | -        | -                            | -                            |
| d <sub>9</sub> (216 h) | HC-LP vs. LC-LP | -                     | -                      | -        | -      | -        | < 0.001*                     | = 0.001*                     |
|                        | HC-LP vs. LC-HP | -                     | -                      | -        | -      | -        | = 0.001*                     | = 0.002*                     |
|                        | LC-LP vs. LC-HP | -                     | -                      | -        | -      | -        | ns                           | ns                           |

| Factor/variable                                                                        | Treatment |
|----------------------------------------------------------------------------------------|-----------|
| $K_M$ ( $\mu\text{M}$ )                                                                | = 0.002*  |
| $V_{\text{max}}$ ( $\text{nmol C} \cdot 10^6 \text{ cells}^{-1} \cdot \text{h}^{-1}$ ) | ns        |
| $\delta^{13} \text{C}_{\text{microalgae}}$ (‰)                                         | < 0.001*  |
| pH compensation point                                                                  | < 0.001*  |

| Factor/variable                                                                        | HC-LP vs. LC-LP | HC-LP vs. LC-HP | LC-LP vs. LC-HP |
|----------------------------------------------------------------------------------------|-----------------|-----------------|-----------------|
| $K_M$ ( $\mu\text{M}$ )                                                                | ns              | = 0.004*        | = 0.004*        |
| $V_{\text{max}}$ ( $\text{nmol C} \cdot 10^6 \text{ cells}^{-1} \cdot \text{h}^{-1}$ ) | ns              | ns              | ns              |
| $\delta^{13} \text{C}_{\text{microalgae}}$ (‰)                                         | < 0.001*        | < 0.001*        | ns              |
| pH compensation point                                                                  | < 0.001*        | < 0.001*        | < 0.001*        |

**Table S5.** Statistical significance of the effects of the treatments ( $\text{CO}_2$  and pH) on the C fixation photosynthetic parameters analyzed by one-way ANOVAs. Significant differences ( $p < 0.05$ ) are indicated with an asterisk (\*); ns: not significant ( $p > 0.05$ ).
